# Supplementary material for: Functional Annotation and Curation of Hypothetical Proteins Present in A Newly Emerged Serotype 1c of Shigella flexneri: Emphasis on Selecting Targets for Virulence and Vaccine Design Studies
Source: MDPI journal article supplement (doi:10.3390/genes11030340), 2020-03-23
Supplement: s1 [file s1]

Supplementary Table 3- Analysis of the subcellular localization and presence of transmembrane helices present in 246 HP's. Bioinformatic tools PSORTb, CELLO and PSLpred were used for subcellular localization; HMMTOP, SOSUI and TMHMM were used identifying soluble or membrane proteins with presence or absence of transmembrane helices; SignalP 4.1 and SecretomeP 2.0 were used for predicting signal peptide and secretory proteins.

| S.No | Protein ID | Sub-Cellular localisation |                      |                | Signal Peptide (SignalP) | Secretory Protein (SecretomeP) | Transmembrane Helices prediction |                |
|------|------------|---------------------------|----------------------|----------------|--------------------------|--------------------------------|----------------------------------|----------------|
|      |            | CELLO                     | PSORTB               | PSLpred        |                          |                                | HMMTOP /TMHMM                    | SOSUI          |
| 1.   | ATH66527.1 | Cytoplasmic               | Cytoplasmic          | Cytoplasmic    | NO                       | YES                            | NO                               | Soluble        |
| 2.   | ATH66629.1 | Cytoplasmic               | Unknown              | Cytoplasmic    | YES                      | NO                             | NO                               | Soluble        |
| 3.   | ATH66635.1 | Extracellular             | Unknown              | Extracellular  | NO                       | NO                             | NO                               | Soluble        |
| 4.   | ATH66643.1 | Inner membrane            | Unknown              | Inner membrane | YES                      | NO                             | Yes;1TM                          | Membrane; 1 TM |
| 5.   | ATH66665.1 | Inner membrane            | Cytoplasmic-Membrane | Inner membrane | NO                       | YES                            | Yes; 7TM                         | Membrane; 7 TM |
| 6.   | ATH66697.1 | Cytoplasmic               | Cytoplasmic          | Cytoplasmic    | NO                       | NO                             | NO                               | Soluble        |
| 7.   | ATH66700.1 | Periplasmic               | Unknown              | Periplasmic    | YES                      | NO                             | NO                               | Soluble        |
| 8.   | ATH66742.1 | Periplasmic               | Cytoplasmic-Membrane | Inner Membrane | NO                       | NO                             | Yes; 2TM                         | Membrane; 2 TM |
| 9.   | ATH66743.  | Periplasmic               | Unknown              | Periplasmic    | YES                      | NO                             | NO                               | Soluble        |

Supplementary Table 3- Analysis of the subcellular localization and presence of transmembrane helices present in 246 HP's. Bioinformatic tools PSORTb, CELLO and PSLpred were used for subcellular localization; HMMTOP, SOSUI and TMHMM were used identifying soluble or membrane proteins with presence or absence of transmembrane helices; SignalP 4.1 and SecretomeP 2.0 were used for predicting signal peptide and secretory proteins.

|     |            |                            |                      |                |     |     |           |                |
|-----|------------|----------------------------|----------------------|----------------|-----|-----|-----------|----------------|
|     | 1          |                            |                      |                |     |     |           |                |
| 10. | ATH66760.1 | Cytoplasmic                | Cytoplasmic-Membrane | Cytoplasmic    | NO  | NO  | NO        | Soluble        |
| 11. | ATH66809.1 | Periplasmic                | Unknown              | Periplasmic    | NO  | NO  | NO        | Soluble        |
| 12. | ATH66812.1 | Cytoplasmic                | Unknown              | Cytoplasmic    | NO  | NO  | NO        | Soluble        |
| 13. | ATH66845.1 | Outer Membrane             | Extracellular        | Extracellular  | YES | NO  | 1TM/NO    | Membrane; 1 TM |
| 14. | ATH66856.1 | Periplasmic                | Unknown              | Periplasmic    | YES | NO  | 1TM/NO    | Soluble        |
| 15. | ATH66865.1 | Periplasmic                | Cytoplasmic-Membrane | Periplasmic    | YES | NO  | NO        | Soluble        |
| 16. | ATH66868.1 | Cytoplasmic                | Unknown              | Cytoplasmic    | NO  | YES | NO        | Soluble        |
| 17. | ATH66876.1 | Periplasmic                | Periplasmic          | Periplasmic    | YES | NO  | NO        | Soluble        |
| 18. | ATH66880.1 | Inner-Membrane             | Cytoplasmic-Membrane | Inner-Membrane | NO  | NO  | Yes; 2 TM | Membrane; 2 TM |
| 19. | ATH66907.1 | Inner membrane/Cytoplasmic | Cytoplasmic          | Cytoplasmic    | NO  | YES | NO        | Soluble        |

Supplementary Table 3- Analysis of the subcellular localization and presence of transmembrane helices present in 246 HP's. Bioinformatic tools PSORTb, CELLO and PSLpred were used for subcellular localization; HMMTOP, SOSUI and TMHMM were used identifying soluble or membrane proteins with presence or absence of transmembrane helices; SignalP 4.1 and SecretomeP 2.0 were used for predicting signal peptide and secretory proteins.

|     |            |                                |                      |                |     |     |            |                |
|-----|------------|--------------------------------|----------------------|----------------|-----|-----|------------|----------------|
| 20. | ATH66913.1 | Inner-Membrane                 | Cytoplasmic-Membrane | Inner-Membrane | NO  | NO  | Yes; 3TM   | Membrane; 3 TM |
| 21. | ATH66937.1 | Outer membrane                 | Outer membrane       | Outer membrane | YES | NO  | Yes; 1TM   | Membrane; 1 TM |
| 22. | ATH66941.1 | Periplasmic                    | Cytoplasmic-membrane | Periplasmic    | YES | NO  | Yes; 1TM   | Membrane; 1 TM |
| 23. | ATH66955.1 | Cytoplasmic                    | Unknown              | Cytoplasmic    | NO  | YES | NO         | Soluble        |
| 24. | ATH66978.1 | Periplasmic                    | Unknown              | Periplasmic    | NO  | NO  | NO         | Soluble        |
| 25. | ATH67045.1 | Outer membrane                 | Outer membrane       | Outer membrane | NO  | NO  | NO         | Soluble        |
| 26. | ATH67048.1 | Outer membrane/<br>Cytoplasmic | Unknown              | Extracellular  | NO  | YES | NO         | Soluble        |
| 27. | ATH67052.1 | Cytoplasmic                    | Cytoplasmic          | Cytoplasmic    | NO  | YES | NO         | Soluble        |
| 28. | ATH67074.1 | Periplasmic                    | Unknown              | Periplasmic    | YES | NO  | YES 1TM/NO | Soluble        |
| 29. | ATH67096.1 | Cytoplasmic/<br>Extracellular  | Cytoplasmic membrane | Cytoplasmic    | YES | NO  | NO         | Soluble        |
| 30. | ATH67099.1 | Cytoplasmic                    | Cytoplasmic          | Cytoplasmic    | NO  | NO  | NO         | Soluble        |

Supplementary Table 3- Analysis of the subcellular localization and presence of transmembrane helices present in 246 HP's. Bioinformatic tools PSORTb, CELLO and PSLpred were used for subcellular localization; HMMTOP, SOSUI and TMHMM were used identifying soluble or membrane proteins with presence or absence of transmembrane helices; SignalP 4.1 and SecretomeP 2.0 were used for predicting signal peptide and secretory proteins.

|     |            |                |                      |                |     |     |            |                |
|-----|------------|----------------|----------------------|----------------|-----|-----|------------|----------------|
| 31. | ATH67100.1 | Outer membrane | Extracellular        | Periplasmic    | NO  | NO  | NO         | Soluble        |
| 32. | ATH67113.1 | Cytoplasmic    | Cytoplasmic          | Cytoplasmic    | NO  | YES | NO         | Soluble        |
| 33. | ATH67162.1 | Cytoplasmic    | Unknown              | Cytoplasmic    | YES | NO  | NO         | Soluble        |
| 34. | ATH67165.1 | Cytoplasmic    | Cytoplasmic          | Cytoplasmic    | NO  | YES | NO         | Soluble        |
| 35. | ATH67175.1 | Cytoplasmic    | Cytoplasmic          | Cytoplasmic    | NO  | NO  | NO         | Soluble        |
| 36. | ATH70531.1 | Cytoplasmic    | Cytoplasmic          | Cytoplasmic    | NO  | NO  | NO         | Soluble        |
| 37. | ATH67180.1 | Cytoplasmic    | Unknown              | Periplasmic    | NO  | NO  | YES 1TM/NO | Soluble        |
| 38. | ATH67230.1 | Cytoplasmic    | Cytoplasmic          | Cytoplasmic    | YES | NO  | YES 1TM/NO | Soluble        |
| 39. | ATH67236.1 | Inner-membrane | Cytoplasmic membrane | Inner-membrane | NO  | NO  | YES; 7 TM  | Membrane; 7 TM |
| 40. | ATH67241.1 | Inner-membrane | Cytoplasmic membrane | Inner-membrane | NO  | YES | YES; 4TM   | Membrane; 4 TM |
| 41. | ATH67298.1 | Inner-membrane | Cytoplasmic membrane | Inner-membrane | NO  | NO  | YES; 4TM   | Membrane; 4 TM |

Supplementary Table 3- Analysis of the subcellular localization and presence of transmembrane helices present in 246 HP's. Bioinformatic tools PSORTb, CELLO and PSLpred were used for subcellular localization; HMMTOP, SOSUI and TMHMM were used identifying soluble or membrane proteins with presence or absence of transmembrane helices; SignalP 4.1 and SecretomeP 2.0 were used for predicting signal peptide and secretory proteins.

|     |            |                |                      |                |     |     |             |                |
|-----|------------|----------------|----------------------|----------------|-----|-----|-------------|----------------|
| 42. | ATH67300.1 | Inner-membrane | Cytoplasmic membrane | Inner-membrane | NO  | NO  | YES; 2TM    | Membrane; 2 TM |
| 43. | ATH67303.1 | Cytoplasmic    | Cytoplasmic membrane | Cytoplasmic    | NO  | NO  | NO          | Soluble        |
| 44. | ATH67308.1 | Inner-membrane | Cytoplasmic membrane | Inner-membrane | NO  | NO  | YES; 4TM    | Membrane; 4 TM |
| 45. | ATH67318.1 | Cytoplasmic    | Unknown              | Cytoplasmic    | NO  | NO  | Yes; 1TM/No | Soluble        |
| 46. | ATH70538.1 | Cytoplasmic    | Cytoplasmic          | Cytoplasmic    | YES | NO  | NO          | Soluble        |
| 47. | ATH67325.1 | Inner-membrane | Cytoplasmic membrane | Inner-membrane | NO  | YES | Yes; 8-9 TM | Membrane; 9 TM |
| 48. | ATH67371.1 | Cytoplasmic    | Unknown              | Cytoplasmic    | NO  | NO  | NO          | Soluble        |
| 49. | ATH67373.1 | Cytoplasmic    | Cytoplasmic          | Cytoplasmic    | NO  | NO  | NO          | Soluble        |
| 50. | ATH70540.1 | Periplasmic    | Unknown              | Cytoplasmic    | YES | NO  | Yes; 1TM    | Membrane; 1 TM |
| 51. | ATH67401.1 | Periplasmic    | Unknown              | Cytoplasmic    | NO  | NO  | Yes 1TM/ NO | Soluble        |
| 52. | ATH67406.1 | Outer Membrane | Unknown              | Periplasmic    | YES | NO  | YES 1TM/NO  | Soluble        |

Supplementary Table 3- Analysis of the subcellular localization and presence of transmembrane helices present in 246 HP's. Bioinformatic tools PSORTb, CELLO and PSLpred were used for subcellular localization; HMMTOP, SOSUI and TMHMM were used identifying soluble or membrane proteins with presence or absence of transmembrane helices; SignalP 4.1 and SecretomeP 2.0 were used for predicting signal peptide and secretory proteins.

|     |            |                  |                      |                     |     |     |             |                |
|-----|------------|------------------|----------------------|---------------------|-----|-----|-------------|----------------|
| 53. | ATH67413.1 | Inner-membrane   | Cytoplasmic membrane | Inner-membrane      | NO  | NO  | Yes 3 TM    | Membrane; 3 TM |
| 54. | ATH67436.1 | Inner - Membrane | Cytoplasmic Membrane | Periplasmic Protein | YES | NO  | NO          | Soluble        |
| 55. | ATH67468.1 | Inner-membrane   | Cytoplasmic membrane | Inner-membrane      | NO  | NO  | Yes; 4-5TM  | Membrane; 4 TM |
| 56. | ATH67536.1 | Periplasmic      | Unknown              | Periplasmic         | YES | NO  | YES; 1TM    | Membrane; 1 TM |
| 57. | ATH67540.1 | Cytoplasmic      | Unknown              | Cytoplasmic         | YES | NO  | NO          | Soluble        |
| 58. | ATH67546.1 | Cytoplasmic      | Cytoplasmic          | Cytoplasmic         | NO  | NO  | NO          | Soluble        |
| 59. | ATH67604.1 | Inner-membrane   | Cytoplasmic membrane | Inner-membrane      | NO  | NO  | Yes; 8-9 TM | Membrane; 8 TM |
| 60. | ATH67634.1 | Cytoplasmic      | Cytoplasmic          | Cytoplasmic         | NO  | YES | NO          | Soluble        |
| 61. | ATH67647.1 | Cytoplasmic      | Unknown              | Cytoplasmic         | NO  | NO  | NO          | Soluble        |
| 62. | ATH67677.1 | Cytoplasmic      | Unknown              | Cytoplasmic         | NO  | YES | NO          | Soluble        |
| 63. | ATH67684.  | Extracellular    | Unknown              | Extracellular       | NO  | YES | NO          | Soluble        |

Supplementary Table 3- Analysis of the subcellular localization and presence of transmembrane helices present in 246 HP's. Bioinformatic tools PSORTb, CELLO and PSLpred were used for subcellular localization; HMMTOP, SOSUI and TMHMM were used identifying soluble or membrane proteins with presence or absence of transmembrane helices; SignalP 4.1 and SecretomeP 2.0 were used for predicting signal peptide and secretory proteins.

|     |            |                |                      |                |     |     |             |                |
|-----|------------|----------------|----------------------|----------------|-----|-----|-------------|----------------|
|     | 1          |                |                      |                |     |     |             |                |
| 64. | ATH67716.1 | Cytoplasmic    | Unknown              | Cytoplasmic    | NO  | NO  | NO          | Soluble        |
| 65. | ATH67743.1 | Outer Membrane | Outer Membrane       | Outer Membrane | NO  | YES | NO          | Soluble        |
| 66. | ATH67744.1 | Cytoplasmic    | Outer Membrane       | Outer Membrane | NO  | NO  | NO          | Soluble        |
| 67. | ATH67746.1 | Cytoplasmic    | Cytoplasmic          | Cytoplasmic    | YES | NO  | NO          | Soluble        |
| 68. | ATH67804.1 | Inner-membrane | Cytoplasmic membrane | Inner-membrane | YES | NO  | Yes; 1TM    | Membrane; 1 TM |
| 69. | ATH67810.1 | Inner-membrane | Cytoplasmic membrane | Inner-membrane | NO  | NO  | Yes; 6 TM   | Membrane; 5 TM |
| 70. | ATH70565.1 | Cytoplasmic    | Cytoplasmic          | Cytoplasmic    | NO  | NO  | NO          | Soluble        |
| 71. | ATH67825.1 | Periplasmic    | Outer Membrane       | Periplasmic    | NO  | YES | Yes; 1TM    | Soluble        |
| 72. | ATH67828.1 | Cytoplasmic    | Unknown              | Extracellular  | NO  | NO  | NO          | Soluble        |
| 73. | ATH67852.1 | Cytoplasmic    | Cytoplasmic          | Cytoplasmic    | NO  | NO  | Yes; 2-3 TM | Membrane; 2 TM |
| 74. | ATH67855.  | Inner-         | Cytoplasmic          | Inner-membrane | NO  | NO  | Yes; 4-5 TM | Membrane; 5 TM |

Supplementary Table 3- Analysis of the subcellular localization and presence of transmembrane helices present in 246 HP's. Bioinformatic tools PSORTb, CELLO and PSLpred were used for subcellular localization; HMMTOP, SOSUI and TMHMM were used identifying soluble or membrane proteins with presence or absence of transmembrane helices; SignalP 4.1 and SecretomeP 2.0 were used for predicting signal peptide and secretory proteins.

|     |            |                |                      |                |     |     |           |                |
|-----|------------|----------------|----------------------|----------------|-----|-----|-----------|----------------|
|     | 1          | membrane       | membrane             |                |     |     |           |                |
| 75. | ATH67883.1 | Inner-membrane | Cytoplasmic membrane | Inner-membrane | NO  | NO  | Yes; 3 TM | Membrane; 3 TM |
| 76. | ATH67885.1 | Cytoplasmic    | Unknown              | Extracellular  | NO  | NO  | NO        | Soluble        |
| 77. | ATH67887.1 | Outer Membrane | Unknown              | Extracellular  | YES | YES | Yes; 1TM  | Membrane; 1TM  |
| 78. | ATH67921.1 | Cytoplasmic    | Cytoplasmic membrane | Inner-membrane | NO  | NO  | NO        | Soluble        |
| 79. | ATH67934.1 | Cytoplasmic    | Unknown              | Cytoplasmic    | NO  | NO  | NO        | Membrane; 1TM  |
| 80. | ATH67952.1 | Inner-membrane | Cytoplasmic membrane | Inner-membrane | NO  | NO  | Yes; 3 TM | Membrane; 4 TM |
| 81. | ATH67957.1 | Periplasmic    | Unknown              | Inner-membrane | YES | NO  | Yes; 1TM  | Membrane; 1TM  |
| 82. | ATH67966.1 | Inner-membrane | Cytoplasmic membrane | Inner-membrane | NO  | NO  | Yes; 4 TM | Membrane; 4 TM |
| 83. | ATH67967.1 | Periplasmic    | Unknown              | Periplasmic    | YES | NO  | Yes; 1TM  | Membrane; 1TM  |
| 84. | ATH67969.1 | Periplasmic    | Unknown              | Periplasmic    | YES | YES | NO        | Membrane; 1TM  |
| 85. | ATH67997.  | Inner-         | Cytoplasmic          | Inner-membrane | NO  | NO  | Yes; 4 TM | Membrane; 4 TM |



Supplementary Table 3- Analysis of the subcellular localization and presence of transmembrane helices present in 246 HP's. Bioinformatic tools PSORTb, CELLO and PSLpred were used for subcellular localization; HMMTOP, SOSUI and TMHMM were used identifying soluble or membrane proteins with presence or absence of transmembrane helices; SignalP 4.1 and SecretomeP 2.0 were used for predicting signal peptide and secretory proteins.

|     |            |                |                      |                |     |     |              |                 |
|-----|------------|----------------|----------------------|----------------|-----|-----|--------------|-----------------|
|     | 1          | membrane       | membrane             |                |     |     |              |                 |
| 86. | ATH68032.1 | Extracellular  | Outer Membrane       | Extracellular  | YES | YES | Yes; 1TM     | Membrane; 1TM   |
| 87. | ATH68055.1 | Extracellular  | Unknown              | Cytoplasmic    | NO  | NO  | NO           | Soluble         |
| 88. | ATH68061.1 | Cytoplasmic    | Cytoplasmic          | Cytoplasmic    | NO  | NO  | NO           | Soluble         |
| 89. | ATH68062.1 | Periplasmic    | Cytoplasmic          | Periplasmic    | YES | NO  | NO           | Soluble         |
| 90. | ATH68063.1 | Cytoplasmic    | Cytoplasmic          | Cytoplasmic    | NO  | NO  | NO           | Soluble         |
| 91. | ATH68075.1 | Cytoplasmic    | Cytoplasmic          | Cytoplasmic    | NO  | NO  | NO           | Soluble         |
| 92. | ATH68076.1 | Inner-membrane | Cytoplasmic membrane | Inner-membrane | NO  | YES | Yes; 9-10 TM | Membrane; 10 TM |
| 93. | ATH68077.1 | Cytoplasmic    | Unknown              | Cytoplasmic    | NO  | NO  | NO           | Soluble         |
| 94. | ATH68089.1 | Periplasmic    | Unknown              | Periplasmic    | YES | YES | Yes; 1TM     | Membrane; 1TM   |
| 95. | ATH68112.1 | Inner-membrane | Cytoplasmic membrane | Inner-membrane | NO  | NO  | Yes; 5 TM    | Membrane; 5 TM  |
| 96. | ATH68113.  | Cytoplasmic    | Unknown              | Cytoplasmic    | NO  | NO  | NO           | Soluble         |

Supplementary Table 3- Analysis of the subcellular localization and presence of transmembrane helices present in 246 HP's. Bioinformatic tools PSORTb, CELLO and PSLpred were used for subcellular localization; HMMTOP, SOSUI and TMHMM were used identifying soluble or membrane proteins with presence or absence of transmembrane helices; SignalP 4.1 and SecretomeP 2.0 were used for predicting signal peptide and secretory proteins.

|      |            |                |                      |                |    |     |             |                |
|------|------------|----------------|----------------------|----------------|----|-----|-------------|----------------|
|      | 1          |                |                      |                |    |     |             |                |
| 97.  | ATH70578.1 | Inner-membrane | Cytoplasmic membrane | Inner-membrane | NO | NO  | Yes; 2 TM   | Membrane; 2 TM |
| 98.  | ATH68125.1 | Cytoplasmic    | Cytoplasmic          | Cytoplasmic    | NO | NO  | NO          | Soluble        |
| 99.  | ATH68140.1 | Cytoplasmic    | Cytoplasmic          | Cytoplasmic    | NO | NO  | NO          | Soluble        |
| 100. | ATH68145.1 | Inner-membrane | Cytoplasmic          | Cytoplasmic    | NO | NO  | NO          | Soluble        |
| 101. | ATH68146.1 | Inner-membrane | Cytoplasmic membrane | Inner-membrane | NO | NO  | Yes; 5-6 TM | Membrane; 5 TM |
| 102. | ATH68152.1 | Periplasmic    | Unknown              | Cytoplasmic    | NO | YES | Yes; 1TM    | Membrane; 1TM  |
| 103. | ATH68154.1 | Periplasmic    | Unknown              | Extracellular  | NO | YES | NO          | Membrane; 1TM  |
| 104. | ATH68182.1 | Periplasmic    | Periplasmic          | Periplasmic    | NO | YES | NO          | Soluble        |
| 105. | ATH68188.1 | Periplasmic    | Extracellular        | Periplasmic    | NO | YES | NO          | Soluble        |
| 106. | ATH68190.1 | Cytoplasmic    | Unknown              | Cytoplasmic    | NO | NO  | NO          | Soluble        |
| 107. | ATH68203.  | Cytoplasmic    | Unknown              | Cytoplasmic    | NO | NO  | NO          | Soluble        |

Supplementary Table 3- Analysis of the subcellular localization and presence of transmembrane helices present in 246 HP's. Bioinformatic tools PSORTb, CELLO and PSLpred were used for subcellular localization; HMMTOP, SOSUI and TMHMM were used identifying soluble or membrane proteins with presence or absence of transmembrane helices; SignalP 4.1 and SecretomeP 2.0 were used for predicting signal peptide and secretory proteins.

|      |            |                |                      |                |    |     |             |                 |
|------|------------|----------------|----------------------|----------------|----|-----|-------------|-----------------|
|      | 1          |                |                      |                |    |     |             |                 |
| 108. | ATH68230.1 | Cytoplasmic    | Unknown              | Cytoplasmic    | NO | NO  | NO          | Soluble         |
| 109. | ATH68234.1 | Cytoplasmic    | Cytoplasmic          | Cytoplasmic    | NO | NO  | NO          | Soluble         |
| 110. | ATH68239.1 | Cytoplasmic    | Cytoplasmic          | Periplasmic    | NO | NO  | NO          | Soluble         |
| 111. | ATH68240.1 | Inner-membrane | Cytoplasmic membrane | Inner-membrane | NO | NO  | Yes; 3-4 TM | Membrane; 3 TM  |
| 112. | ATH68248.1 | Cytoplasmic    | Unknown              | Extracellular  | NO | NO  | NO          | Membrane; 1 TM  |
| 113. | ATH68250.1 | Cytoplasmic    | Cytoplasmic          | Cytoplasmic    | NO | NO  | NO          | Soluble         |
| 114. | ATH68272.1 | Cytoplasmic    | Unknown              | Inner-membrane | NO | NO  | NO          | Membrane; 1 TM  |
| 115. | ATH68293.1 | Periplasmic    | Unknown              | Periplasmic    | NO | YES | NO          | Membrane; 1 TM  |
| 116. | ATH68294.1 | Inner-membrane | Cytoplasmic membrane | Inner-membrane | NO | NO  | Yes; 10 TM  | Membrane; 10 TM |
| 117. | ATH68297.1 | Periplasmic    | Periplasmic          | Periplasmic    | NO | YES | Yes; 1 TM   | Membrane; 1 TM  |
| 118. | ATH68320.  | Cytoplasmic    | Unknown              | Cytoplasmic    | NO | NO  | NO          | Soluble         |

Supplementary Table 3- Analysis of the subcellular localization and presence of transmembrane helices present in 246 HP's. Bioinformatic tools PSORTb, CELLO and PSLpred were used for subcellular localization; HMMTOP, SOSUI and TMHMM were used identifying soluble or membrane proteins with presence or absence of transmembrane helices; SignalP 4.1 and SecretomeP 2.0 were used for predicting signal peptide and secretory proteins.

|      |            |                |                      |                |     |     |           |                |
|------|------------|----------------|----------------------|----------------|-----|-----|-----------|----------------|
|      | 1          |                |                      |                |     |     |           |                |
| 119. | ATH68327.1 | Cytoplasmic    | Cytoplasmic membrane | Inner-membrane | NO  | NO  | Yes; 1 TM | Membrane; 1 TM |
| 120. | ATH68340.1 | Cytoplasmic    | Cytoplasmic          | Cytoplasmic    | NO  | NO  | NO        | Soluble        |
| 121. | ATH68357.1 | Cytoplasmic    | Cytoplasmic          | Cytoplasmic    | NO  | NO  | NO        | Soluble        |
| 122. | ATH68374.1 | Cytoplasmic    | Unknown              | Cytoplasmic    | NO  | YES | NO        | Soluble        |
| 123. | ATH70596.1 | Cytoplasmic    | Unknown              | Inner-membrane | YES | NO  | YES; 2TM  | Membrane; 2 TM |
| 124. | ATH68421.1 | Inner-membrane | Cytoplasmic membrane | Inner-membrane | NO  | NO  | Yes; 5 TM | Membrane; 4 TM |
| 125. | ATH68460.1 | Extracellular  | Unknown              | Extracellular  | NO  | YES | Yes; 1 TM | Membrane; 1 TM |
| 126. | ATH68471.1 | Cytoplasmic    | Cytoplasmic          | Cytoplasmic    | NO  | NO  | NO        | Soluble        |
| 127. | ATH68472.1 | Inner-membrane | Cytoplasmic membrane | Cytoplasmic    | NO  | NO  | NO        | Soluble        |
| 128. | ATH68473.1 | Periplasmic    | Unknown              | Periplasmic    | NO  | YES | Yes; 1 TM | Membrane; 1 TM |
| 129. | ATH68497.  | Inner-         | Cytoplasmic          | Inner-membrane | NO  | NO  | Yes; 4 TM | Membrane; 3 TM |

Supplementary Table 3- Analysis of the subcellular localization and presence of transmembrane helices present in 246 HP's. Bioinformatic tools PSORTb, CELLO and PSLpred were used for subcellular localization; HMMTOP, SOSUI and TMHMM were used identifying soluble or membrane proteins with presence or absence of transmembrane helices; SignalP 4.1 and SecretomeP 2.0 were used for predicting signal peptide and secretory proteins.

|      |            |                         |                      |                |     |     |            |                 |
|------|------------|-------------------------|----------------------|----------------|-----|-----|------------|-----------------|
|      | 1          | membrane                | membrane             |                |     |     |            |                 |
| 130. | ATH68515.1 | Inner-membrane          | Cytoplasmic membrane | Inner-membrane | NO  | NO  | Yes; 9 TM  | Membrane; 10 TM |
| 131. | ATH68531.1 | Inner-membrane          | Cytoplasmic membrane | Inner-membrane | NO  | NO  | Yes; 5 TM  | Membrane; 5 TM  |
| 132. | ATH68551.1 | Periplasmic             | Unknown              | Periplasmic    | NO  | YES | NO         | Soluble         |
| 133. | ATH68606.1 | Cytoplasmic/Periplasmic | Unknown              | Periplasmic    | YES | NO  | YES; 2TM   | Soluble         |
| 134. | ATH68609.1 | Cytoplasmic             | Cytoplasmic          | Cytoplasmic    | NO  | NO  | NO         | Soluble         |
| 135. | ATH68611.1 | Cytoplasmic             | Unknown              | Cytoplasmic    | NO  | NO  | NO         | Soluble         |
| 136. | ATH68620.1 | Outer-membrane          | Unknown              | Outer-membrane | NO  | YES | Yes; 1 TM  | Membrane; 1 TM  |
| 137. | ATH68658.1 | Cytoplasmic             | Cytoplasmic          | Inner-membrane | NO  | NO  | NO         | Soluble         |
| 138. | ATH68659.1 | Inner-membrane          | Cytoplasmic membrane | Inner-membrane | NO  | NO  | Yes; 1TM   | Membrane; 1TM   |
| 139. | ATH68662.1 | Inner-membrane          | Cytoplasmic membrane | Inner-membrane | NO  | NO  | Yes; 13 TM | Membrane; 10 TM |
| 140. | ATH68680.  | Inner-                  | Cytoplasmic          | Inner-membrane | NO  | YES | Yes; 6 TM  | Membrane; 5 TM  |

Supplementary Table 3- Analysis of the subcellular localization and presence of transmembrane helices present in 246 HP's. Bioinformatic tools PSORTb, CELLO and PSLpred were used for subcellular localization; HMMTOP, SOSUI and TMHMM were used identifying soluble or membrane proteins with presence or absence of transmembrane helices; SignalP 4.1 and SecretomeP 2.0 were used for predicting signal peptide and secretory proteins.

|      |            |                |                      |                |    |    |           |                |
|------|------------|----------------|----------------------|----------------|----|----|-----------|----------------|
|      | 1          | membrane       | membrane             |                |    |    |           |                |
| 141. | ATH68691.1 | Inner-membrane | Cytoplasmic membrane | Inner-membrane | NO | NO | Yes; 9 TM | Membrane; 7 TM |
| 142. | ATH68709.1 | Inner-membrane | Cytoplasmic membrane | Inner-membrane | NO | NO | Yes; 6 TM | Membrane; 4 TM |
| 143. | ATH68713.1 | Inner-membrane | Cytoplasmic membrane | Inner-membrane | NO | NO | Yes; 2 TM | Membrane; 2 TM |
| 144. | ATH68737.1 | Periplasmic    | Unknown              | Cytoplasmic    | NO | NO | YES; 1TM  | Soluble        |
| 145. | ATH68741.1 | Cytoplasmic    | Unknown              | Cytoplasmic    | NO | NO | NO        | Soluble        |
| 146. | ATH68742.1 | Cytoplasmic    | Unknown              | Cytoplasmic    | NO | NO | NO        | Soluble        |
| 147. | ATH68747.1 | Cytoplasmic    | Unknown              | Cytoplasmic    | NO | NO | NO        | Soluble        |
| 148. | ATH68756.1 | Cytoplasmic    | Unknown              | Cytoplasmic    | NO | NO | NO        | Membrane; 1 TM |
| 149. | ATH68766.1 | Inner-membrane | Cytoplasmic membrane | Inner-membrane | NO | NO | Yes; 4 TM | Membrane; 4 TM |
| 150. | ATH70611.1 | Cytoplasmic    | Unknown              | Cytoplasmic    | NO | NO | NO        | Soluble        |
| 151. | ATH68777.  | Inner-         | Cytoplasmic          | Inner-membrane | NO | NO | Yes 3 TM  | Membrane; 3 TM |

Supplementary Table 3- Analysis of the subcellular localization and presence of transmembrane helices present in 246 HP's. Bioinformatic tools PSORTb, CELLO and PSLpred were used for subcellular localization; HMMTOP, SOSUI and TMHMM were used identifying soluble or membrane proteins with presence or absence of transmembrane helices; SignalP 4.1 and SecretomeP 2.0 were used for predicting signal peptide and secretory proteins.

|      |            |                            |                      |                     |     |     |           |                |
|------|------------|----------------------------|----------------------|---------------------|-----|-----|-----------|----------------|
|      | 1          | membrane                   | membrane             |                     |     |     |           |                |
| 152. | ATH68793.1 | Inner - Membrane           | Cytoplasmic Membrane | Periplasmic Protein | YES | NO  | NO        | Soluble        |
| 153. | ATH68830.1 | Cytoplasmic                | Unknown              | Cytoplasmic         | NO  | YES | NO        | Soluble        |
| 154. | ATH68837.1 | Cytoplasmic                | Unknown              | Inner-membrane      | YES | NO  | YES; 2TM  | Membrane; 2 TM |
| 155. | ATH68856.1 | Inner-Membrane             | Cytoplasmic-Membrane | Inner-Membrane      | NO  | NO  | Yes; 2 TM | Membrane; 2 TM |
| 156. | ATH68864.1 | Inner membrane/Cytoplasmic | Cytoplasmic          | Cytoplasmic         | NO  | YES | NO        | Soluble        |
| 157. | ATH68917.1 | Inner-Membrane             | Cytoplasmic-Membrane | Inner-Membrane      | NO  | NO  | Yes; 3TM  | Membrane; 3 TM |
| 158. | ATH68929.1 | Cytoplasmic                | Unknown              | Cytoplasmic         | NO  | YES | NO        | Soluble        |
| 159. | ATH68931.1 | Periplasmic                | Periplasmic          | Periplasmic         | YES | NO  | NO        | Soluble        |
| 160. | ATH68947.1 | Inner-Membrane             | Cytoplasmic-Membrane | Inner-Membrane      | NO  | NO  | Yes; 2 TM | Membrane; 2 TM |
| 161. | ATH68957.  | Cytoplasmic                | Cytoplasmic          | Cytoplasmic         | NO  | NO  | NO        | Soluble        |

Supplementary Table 3- Analysis of the subcellular localization and presence of transmembrane helices present in 246 HP's. Bioinformatic tools PSORTb, CELLO and PSLpred were used for subcellular localization; HMMTOP, SOSUI and TMHMM were used identifying soluble or membrane proteins with presence or absence of transmembrane helices; SignalP 4.1 and SecretomeP 2.0 were used for predicting signal peptide and secretory proteins.

|      |            |                            |                      |                |     |     |             |                |
|------|------------|----------------------------|----------------------|----------------|-----|-----|-------------|----------------|
|      | 1          |                            |                      |                |     |     |             |                |
| 162. | ATH68961.1 | Cytoplasmic                | Unknown              | Cytoplasmic    | NO  | NO  | NO          | Soluble        |
| 163. | ATH68975.1 | Cytoplasmic                | Cytoplasmic          | Cytoplasmic    | NO  | NO  | NO          | Soluble        |
| 164. | ATH69025.1 | Periplasmic                | Unknown              | Cytoplasmic    | YES | NO  | Yes; 1TM    | Membrane; 1 TM |
| 165. | ATH69052.1 | Periplasmic                | Unknown              | Cytoplasmic    | NO  | NO  | Yes 1TM/ NO | Soluble        |
| 166. | ATH69068.1 | Outer Membrane             | Unknown              | Periplasmic    | YES | NO  | YES 1TM/NO  | Soluble        |
| 167. | ATH69109.1 | Inner-membrane             | Cytoplasmic membrane | Inner-membrane | NO  | NO  | Yes 3 TM    | Membrane; 3 TM |
| 168. | ATH69124.1 | Cytoplasmic/ Extracellular | Cytoplasmic membrane | Cytoplasmic    | YES | NO  | NO          | Soluble        |
| 169. | ATH69181.1 | Cytoplasmic                | Cytoplasmic          | Cytoplasmic    | NO  | NO  | NO          | Soluble        |
| 170. | ATH69187.1 | Outer membrane             | Extracellular        | Periplasmic    | NO  | NO  | NO          | Soluble        |
| 171. | ATH69209.1 | Cytoplasmic                | Unknown              | Cytoplasmic    | NO  | YES | NO          | Soluble        |
| 172. | ATH69239.  | Cytoplasmic                | Unknown              | Inner-membrane | YES | NO  | YES; 2TM    | Membrane; 2 TM |



Supplementary Table 3- Analysis of the subcellular localization and presence of transmembrane helices present in 246 HP's. Bioinformatic tools PSORTb, CELLO and PSLpred were used for subcellular localization; HMMTOP, SOSUI and TMHMM were used identifying soluble or membrane proteins with presence or absence of transmembrane helices; SignalP 4.1 and SecretomeP 2.0 were used for predicting signal peptide and secretory proteins.

|      |            |                |                      |                |     |     |           |                |
|------|------------|----------------|----------------------|----------------|-----|-----|-----------|----------------|
|      | 1          |                |                      |                |     |     |           |                |
| 173. | ATH69259.1 | Cytoplasmic    | Unknown              | Cytoplasmic    | NO  | YES | NO        | Soluble        |
| 174. | ATH69265.1 | Periplasmic    | Periplasmic          | Periplasmic    | YES | NO  | NO        | Soluble        |
| 175. | ATH69300.1 | Inner-Membrane | Cytoplasmic-Membrane | Inner-Membrane | NO  | NO  | Yes; 2 TM | Membrane; 2 TM |
| 176. | ATH69301.1 | Inner-Membrane | Cytoplasmic-Membrane | Inner-Membrane | NO  | NO  | Yes; 3TM  | Membrane; 3 TM |
| 177. | ATH69313.1 | Outer membrane | Outer membrane       | Outer membrane | YES | NO  | Yes; 1TM  | Membrane; 1 TM |
| 178. | ATH69314.1 | Periplasmic    | Cytoplasmic-membrane | Periplasmic    | YES | NO  | Yes; 1TM  | Membrane; 1 TM |
| 179. | ATH69322.1 | Cytoplasmic    | Unknown              | Cytoplasmic    | NO  | YES | NO        | Soluble        |
| 180. | ATH69323.1 | Inner-membrane | Cytoplasmic membrane | Inner-membrane | NO  | NO  | Yes; 3 TM | Membrane; 4 TM |
| 181. | ATH69359.1 | Periplasmic    | Unknown              | Inner-membrane | YES | NO  | Yes; 1TM  | Membrane; 1TM  |
| 182. | ATH69360.1 | Inner-membrane | Cytoplasmic membrane | Inner-membrane | NO  | NO  | Yes; 4 TM | Membrane; 4 TM |

Supplementary Table 3- Analysis of the subcellular localization and presence of transmembrane helices present in 246 HP's. Bioinformatic tools PSORTb, CELLO and PSLpred were used for subcellular localization; HMMTOP, SOSUI and TMHMM were used identifying soluble or membrane proteins with presence or absence of transmembrane helices; SignalP 4.1 and SecretomeP 2.0 were used for predicting signal peptide and secretory proteins.

|      |            |                |                      |                |     |     |           |                |
|------|------------|----------------|----------------------|----------------|-----|-----|-----------|----------------|
| 183. | ATH69408.1 | Periplasmic    | Unknown              | Periplasmic    | YES | NO  | Yes; 1TM  | Membrane; 1TM  |
| 184. | ATH69432.1 | Inner membrane | Cytoplasmic-Membrane | Inner membrane | NO  | YES | Yes; 7TM  | Membrane; 7 TM |
| 185. | ATH69450.1 | Cytoplasmic    | Cytoplasmic          | Cytoplasmic    | NO  | NO  | NO        | Soluble        |
| 186. | ATH69450.1 | Periplasmic    | Unknown              | Periplasmic    | YES | NO  | NO        | Soluble        |
| 187. | ATH69519.1 | Periplasmic    | Cytoplasmic-Membrane | Inner Membrane | NO  | NO  | Yes; 2TM  | Membrane; 2 TM |
| 188. | ATH69527.1 | Periplasmic    | Unknown              | Periplasmic    | YES | NO  | NO        | Soluble        |
| 189. | ATH69530.1 | Outer Membrane | Unknown              | Extracellular  | YES | YES | Yes; 1TM  | Membrane; 1TM  |
| 190. | ATH69548.1 | Cytoplasmic    | Cytoplasmic membrane | Inner-membrane | NO  | NO  | NO        | Soluble        |
| 191. | ATH69552.1 | Cytoplasmic    | Unknown              | Cytoplasmic    | NO  | NO  | NO        | Membrane; 1TM  |
| 192. | ATH69554.1 | Inner-membrane | Cytoplasmic membrane | Inner-membrane | NO  | NO  | Yes; 3 TM | Membrane; 4 TM |
| 193. | ATH69573.1 | Periplasmic    | Unknown              | Inner-membrane | YES | NO  | Yes; 1TM  | Membrane; 1TM  |

Supplementary Table 3- Analysis of the subcellular localization and presence of transmembrane helices present in 246 HP's. Bioinformatic tools PSORTb, CELLO and PSLpred were used for subcellular localization; HMMTOP, SOSUI and TMHMM were used identifying soluble or membrane proteins with presence or absence of transmembrane helices; SignalP 4.1 and SecretomeP 2.0 were used for predicting signal peptide and secretory proteins.

|      |            |                |                      |                |     |     |           |                |
|------|------------|----------------|----------------------|----------------|-----|-----|-----------|----------------|
| 194. | ATH69585.1 | Cytoplasmic    | Unknown              | Cytoplasmic    | NO  | YES | NO        | Soluble        |
| 195. | ATH69653.1 | Cytoplasmic    | Unknown              | Inner-membrane | YES | NO  | YES; 2TM  | Membrane; 2 TM |
| 196. | ATH69662.1 | Extracellular  | Unknown              | Extracellular  | NO  | NO  | NO        | Soluble        |
| 197. | ATH69677.1 | Periplasmic    | Unknown              | Periplasmic    | YES | YES | NO        | Membrane; 1TM  |
| 198. | ATH69683.1 | Inner-membrane | Cytoplasmic membrane | Inner-membrane | NO  | NO  | Yes; 4 TM | Membrane; 4 TM |
| 199. | ATH69717.1 | Extracellular  | Outer Membrane       | Extracellular  | YES | YES | Yes; 1TM  | Membrane; 1TM  |
| 200. | ATH69741.1 | Extracellular  | Unknown              | Cytoplasmic    | NO  | NO  | NO        | Soluble        |
| 201. | ATH69743.1 | Cytoplasmic    | Cytoplasmic          | Cytoplasmic    | NO  | NO  | NO        | Soluble        |
| 202. | ATH69744.1 | Cytoplasmic    | Unknown              | Cytoplasmic    | NO  | YES | NO        | Soluble        |
| 203. | ATH69782.1 | Periplasmic    | Periplasmic          | Periplasmic    | YES | NO  | NO        | Soluble        |
| 204. | ATH70654.1 | Inner-Membrane | Cytoplasmic-Membrane | Inner-Membrane | NO  | NO  | Yes; 2 TM | Membrane; 2 TM |

Supplementary Table 3- Analysis of the subcellular localization and presence of transmembrane helices present in 246 HP's. Bioinformatic tools PSORTb, CELLO and PSLpred were used for subcellular localization; HMMTOP, SOSUI and TMHMM were used identifying soluble or membrane proteins with presence or absence of transmembrane helices; SignalP 4.1 and SecretomeP 2.0 were used for predicting signal peptide and secretory proteins.

|      |            |                                   |                          |                |     |     |            |                |
|------|------------|-----------------------------------|--------------------------|----------------|-----|-----|------------|----------------|
| 205. | ATH69795.1 | Periplasmic                       | Unknown                  | Periplasmic    | YES | NO  | YES 1TM/NO | Soluble        |
| 206. | ATH69815.1 | Cytoplasmic/<br>Extracellular     | Cytoplasmic<br>membrane  | Cytoplasmic    | YES | NO  | NO         | Soluble        |
| 207. | ATH69824.1 | Cytoplasmic                       | Cytoplasmic              | Cytoplasmic    | NO  | NO  | NO         | Soluble        |
| 208. | ATH69836.1 | Outer<br>membrane                 | Extracellular            | Periplasmic    | NO  | NO  | NO         | Soluble        |
| 209. | ATH69872.1 | Extracellular                     | Unknown                  | Extracellular  | NO  | NO  | NO         | Soluble        |
| 210. | ATH70659.1 | Cytoplasmic                       | Cytoplasmic              | Cytoplasmic    | NO  | YES | NO         | Soluble        |
| 211. | ATH70660.1 | Periplasmic                       | Unknown                  | Periplasmic    | YES | NO  | YES 1TM/NO | Soluble        |
| 212. | ATH69906.1 | Cytoplasmic/<br>Extracellular     | Cytoplasmic<br>membrane  | Cytoplasmic    | YES | NO  | NO         | Soluble        |
| 213. | ATH69913.1 | Cytoplasmic                       | Cytoplasmic              | Cytoplasmic    | NO  | NO  | NO         | Soluble        |
| 214. | ATH69954.1 | Inner-<br>Membrane                | Cytoplasmic-<br>Membrane | Inner-Membrane | NO  | NO  | Yes; 2 TM  | Membrane; 2 TM |
| 215. | ATH69997.1 | Inner<br>membrane/<br>Cytoplasmic | Cytoplasmic              | Cytoplasmic    | NO  | YES | NO         | Soluble        |

Supplementary Table 3- Analysis of the subcellular localization and presence of transmembrane helices present in 246 HP's. Bioinformatic tools PSORTb, CELLO and PSLpred were used for subcellular localization; HMMTOP, SOSUI and TMHMM were used identifying soluble or membrane proteins with presence or absence of transmembrane helices; SignalP 4.1 and SecretomeP 2.0 were used for predicting signal peptide and secretory proteins.

|      |            |                  |                      |                     |     |     |            |                 |
|------|------------|------------------|----------------------|---------------------|-----|-----|------------|-----------------|
| 216. | ATH70006.1 | Inner-Membrane   | Cytoplasmic-Membrane | Inner-Membrane      | NO  | NO  | Yes; 3TM   | Membrane; 3 TM  |
| 217. | ATH70008.1 | Inner-membrane   | Cytoplasmic membrane | Inner-membrane      | NO  | NO  | Yes 3 TM   | Membrane; 3 TM  |
| 218. | ATH70042.1 | Inner - Membrane | Cytoplasmic Membrane | Periplasmic Protein | YES | NO  | NO         | Soluble         |
| 219. | ATH70056.1 | Extracellular    | Unknown              | Extracellular       | NO  | NO  | NO         | Soluble         |
| 220. | ATH70067.1 | Inner-membrane   | Cytoplasmic membrane | Inner-membrane      | NO  | NO  | Yes; 10 TM | Membrane; 10 TM |
| 221. | ATH70101.1 | Periplasmic      | Periplasmic          | Periplasmic         | NO  | YES | Yes; 1 TM  | Membrane; 1 TM  |
| 222. | ATH70117.1 | Cytoplasmic      | Unknown              | Cytoplasmic         | NO  | NO  | NO         | Soluble         |
| 223. | ATH70671.1 | Cytoplasmic      | Cytoplasmic membrane | Inner-membrane      | NO  | NO  | Yes; 1 TM  | Membrane; 1 TM  |
| 224. | ATH70198.1 | Cytoplasmic      | Cytoplasmic          | Cytoplasmic         | NO  | NO  | NO         | Soluble         |
| 225. | ATH70203.1 | Outer Membrane   | Outer Membrane       | Outer Membrane      | NO  | YES | NO         | Soluble         |
| 226. | ATH70213.  | Cytoplasmic      | Outer                | Outer Membrane      | NO  | NO  | NO         | Soluble         |

Supplementary Table 3- Analysis of the subcellular localization and presence of transmembrane helices present in 246 HP's. Bioinformatic tools PSORTb, CELLO and PSLpred were used for subcellular localization; HMMTOP, SOSUI and TMHMM were used identifying soluble or membrane proteins with presence or absence of transmembrane helices; SignalP 4.1 and SecretomeP 2.0 were used for predicting signal peptide and secretory proteins.

|      |            |                           |                      |                |     |     |            |                |
|------|------------|---------------------------|----------------------|----------------|-----|-----|------------|----------------|
|      | 1          |                           | Membrane             |                |     |     |            |                |
| 227. | ATH70218.1 | Cytoplasmic               | Cytoplasmic          | Cytoplasmic    | YES | NO  | NO         | Soluble        |
| 228. | ATH70219.1 | Periplasmic               | Unknown              | Periplasmic    | YES | NO  | NO         | Soluble        |
| 229. | ATH70237.1 | Periplasmic               | Unknown              | Periplasmic    | YES | NO  | NO         | Soluble        |
| 230. | ATH70244.1 | Periplasmic               | Cytoplasmic-Membrane | Inner Membrane | NO  | NO  | Yes; 2TM   | Membrane; 2 TM |
| 231. | ATH70274.1 | Periplasmic               | Unknown              | Periplasmic    | YES | NO  | NO         | Soluble        |
| 232. | ATH70275.1 | Inner membrane            | Cytoplasmic-Membrane | Inner membrane | NO  | YES | Yes; 7TM   | Membrane; 7 TM |
| 233. | ATH70277.1 | Cytoplasmic               | Cytoplasmic          | Cytoplasmic    | NO  | NO  | NO         | Soluble        |
| 234. | ATH70286.1 | Cytoplasmic               | Cytoplasmic          | Cytoplasmic    | NO  | YES | NO         | Soluble        |
| 235. | ATH70287.1 | Periplasmic               | Unknown              | Periplasmic    | YES | NO  | YES 1TM/NO | Soluble        |
| 236. | ATH70326.1 | Cytoplasmic/Extracellular | Cytoplasmic membrane | Cytoplasmic    | YES | NO  | NO         | Soluble        |
| 237. | ATH70347.  | Cytoplasmic               | Cytoplasmic          | Cytoplasmic    | NO  | NO  | NO         | Soluble        |

Supplementary Table 3- Analysis of the subcellular localization and presence of transmembrane helices present in 246 HP's. Bioinformatic tools PSORTb, CELLO and PSLpred were used for subcellular localization; HMMTOP, SOSUI and TMHMM were used identifying soluble or membrane proteins with presence or absence of transmembrane helices; SignalP 4.1 and SecretomeP 2.0 were used for predicting signal peptide and secretory proteins.

|      | 1              |                |                      |                |     |     |           |                |
|------|----------------|----------------|----------------------|----------------|-----|-----|-----------|----------------|
| 238. | ATH70373.<br>1 | Periplasmic    | Extracellular        | Extracellular  | NO  | YES | Yes; 1 TM | Membrane; 1 TM |
| 239. | ATH70395.<br>1 | Periplasmic    | Outer-membrane       | Cytoplasmic    | YES | NO  | Yes; 1 TM | Membrane; 1 TM |
| 240. | ATH70424.<br>1 | Cytoplasmic    | Cytoplasmic          | Cytoplasmic    | NO  | NO  | NO        | Soluble        |
| 241. | ATH70426.<br>1 | Periplasmic    | Unknown              | Inner-membrane | NO  | YES | NO        | Soluble        |
| 242. | ATH70436.<br>1 | Periplasmic    | Unknown              | Cytoplasmic    | YES | NO  | NO        | Soluble        |
| 243. | ATH70444.<br>1 | Cytoplasmic    | Unknown              | Inner-membrane | NO  | YES | NO        | Soluble        |
| 244. | ATH70449.<br>1 | Periplasmic    | Unknown              | Periplasmic    | NO  | YES | NO        | Soluble        |
| 245. | ATH70469.<br>1 | Inner-membrane | Cytoplasmic membrane | Inner-membrane | NO  | NO  | Yes; 4 TM | Membrane; 5 TM |
| 246. | ATH70687.<br>1 | Inner-membrane | Cytoplasmic membrane | Inner-membrane | NO  | NO  | Yes; 4 TM | Membrane; 5 TM |
