# Supplementary material for: Functional Annotation and Curation of Hypothetical Proteins Present in A Newly Emerged Serotype 1c of Shigella flexneri: Emphasis on Selecting Targets for Virulence and Vaccine Design Studies
Source: MDPI journal article supplement (doi:10.3390/genes11030340), 2020-03-23
Supplement: s1 [file s1]

Supplementary Table 4- Virulence factor prediction of the 246 HP's. Prediction and analysis was done using bioinformatic tools like VICMpred and VirulentPred which are based on PSI-Blast and Support Vector Machine (SVM) method.

| S.No | Protein ID | VICMpred            | VirulentPred |
|------|------------|---------------------|--------------|
| 1.   | ATH66527.1 | Cellular process    | Virulent     |
| 2.   | ATH66629.1 | Cellular process    | Virulent     |
| 3.   | ATH66635.1 | Cellular process    | Virulent     |
| 4.   | ATH66643.1 | Metabolism molecule | Virulent     |
| 5.   | ATH66665.1 | Metabolism molecule | Non-virulent |
| 6.   | ATH66697.1 | Cellular process    | Virulent     |
| 7.   | ATH66700.1 | Cellular process    | Virulent     |
| 8.   | ATH66742.1 | Metabolism molecule | Non-virulent |
| 9.   | ATH66743.1 | Cellular process    | Virulent     |
| 10.  | ATH66760.1 | Metabolism molecule | Non-virulent |
| 11.  | ATH66809.1 | Metabolism molecule | Virulent     |
| 12.  | ATH66812.1 | Cellular process    | Virulent     |
| 13.  | ATH66845.1 | Metabolism molecule | Virulent     |
| 14.  | ATH66856.1 | Metabolism molecule | Non-virulent |
| 15.  | ATH66865.1 | Metabolism molecule | Virulent     |
| 16.  | ATH66868.1 | Metabolism molecule | Virulent     |
| 17.  | ATH66876.1 | Metabolism molecule | Non-virulent |
| 18.  | ATH66880.1 | Metabolism molecule | Non-virulent |
| 19.  | ATH66907.1 | Metabolism molecule | Virulent     |
| 20.  | ATH66913.1 | Cellular process    | Non-virulent |
| 21.  | ATH66937.1 | Metabolism molecule | Virulent     |
| 22.  | ATH66941.1 | Virulence factor    | Virulent     |
| 23.  | ATH66955.1 | Metabolism molecule | Virulent     |
| 24.  | ATH66978.1 | Metabolism molecule | Non-virulent |

Supplementary Table 4- Virulence factor prediction of the 246 HP's. Prediction and analysis was done using bioinformatic tools like VICMpred and VirulentPred which are based on PSI-Blast and Support Vector Machine (SVM) method.

|     |            |                         |              |
|-----|------------|-------------------------|--------------|
| 25. | ATH67045.1 | Cellular process        | Non-virulent |
| 26. | ATH67048.1 | Metabolism molecule     | Virulent     |
| 27. | ATH67052.1 | Metabolism molecule     | Non-virulent |
| 28. | ATH67074.1 | Information and Storage | Non-virulent |
| 29. | ATH67096.1 | Metabolism molecule     | Non-virulent |
| 30. | ATH67099.1 | Metabolism molecule     |              |
| 31. | ATH67100.1 | Cellular process        |              |
| 32. | ATH67113.1 | Information and Storage |              |
| 33. | ATH67162.1 | Virulence factor        | Virulent     |
| 34. | ATH67165.1 | Cellular process        | Virulent     |
| 35. | ATH67175.1 | Metabolism molecule     | Virulent     |
| 36. | ATH70531.1 | Metabolism molecule     | Non-virulent |
| 37. | ATH67180.1 | Cellular process        | Non-virulent |
| 38. | ATH67230.1 | Cellular Process        | Virulent     |
| 39. | ATH67236.1 | Cellular process        | Non-virulent |
| 40. | ATH67241.1 | Cellular process        | Virulent     |
| 41. | ATH67298.1 | Cellular process        | Virulent     |
| 42. | ATH67300.1 | Metabolism molecule     | Non-virulent |
| 43. | ATH67303.1 | Metabolism molecule     | Non-virulent |
| 44. | ATH67308.1 | Metabolism molecule     | Virulent     |
| 45. | ATH67318.1 | Cellular process        | Virulent     |
| 46. | ATH70538.1 | Cellular process        | Non-virulent |
| 47. | ATH67325.1 | Cellular process        | Non-virulent |
| 48. | ATH67371.1 | Cellular process        | Virulent     |
| 49. | ATH67373.1 | Cellular process        | Non-virulent |
| 50. | ATH70540.1 | Metabolism Molecule     | Non-virulent |
| 51. | ATH67401.1 | Metabolism Molecule     | Non-virulent |
| 52. | ATH67406.1 | Metabolism Molecule     | Virulent     |

Supplementary Table 4- Virulence factor prediction of the 246 HP's. Prediction and analysis was done using bioinformatic tools like VICMpred and VirulentPred which are based on PSI-Blast and Support Vector Machine (SVM) method.

|     |            |                     |              |
|-----|------------|---------------------|--------------|
| 53. | ATH67413.1 | Cellular process    | Non-virulent |
| 54. | ATH67436.1 | Cellular process    | Non-virulent |
| 55. | ATH67468.1 | Metabolism Molecule | Virulent     |
| 56. | ATH67536.1 | Metabolism Molecule | Non-virulent |
| 57. | ATH67540.1 | Metabolism Molecule | Non-virulent |
| 58. | ATH67546.1 | Cellular process    | Non-virulent |
| 59. | ATH67604.1 | Cellular process    |              |
| 60. | ATH67634.1 | Cellular process    |              |
| 61. | ATH67647.1 | Cellular process    | Virulent     |
| 62. | ATH67677.1 | Metabolism molecule | Non-virulent |
| 63. | ATH67684.1 | Cellular process    | Virulent     |
| 64. | ATH67716.1 | Cellular process    | Virulent     |
| 65. | ATH67743.1 | Cellular process    | Non-virulent |
| 66. | ATH67744.1 | Cellular process    | Virulent     |
| 67. | ATH67746.1 | Metabolism molecule | Non-virulent |
| 68. | ATH67804.1 | Cellular process    | Non-virulent |
| 69. | ATH67810.1 | Metabolism molecule | Non-virulent |
| 70. | ATH70565.1 | Metabolism molecule | Non-virulent |
| 71. | ATH67825.1 | Cellular process    | Virulent     |
| 72. | ATH67828.1 | Cellular process    | Non-virulent |
| 73. | ATH67852.1 | Metabolism molecule | Virulent     |
| 74. | ATH67855.1 | Metabolism molecule | Non-virulent |
| 75. | ATH67883.1 | Metabolism molecule | Non-virulent |
| 76. | ATH67885.1 | Cellular process    | Virulent     |
| 77. | ATH67887.1 | Cellular process    | Virulent     |
| 78. | ATH67921.1 | Metabolism molecule | Non-virulent |
| 79. | ATH67934.1 | Cellular process    | Non-virulent |
| 80. | ATH67952.1 | Cellular process    | Virulent     |

Supplementary Table 4- Virulence factor prediction of the 246 HP's. Prediction and analysis was done using bioinformatic tools like VICMpred and VirulentPred which are based on PSI-Blast and Support Vector Machine (SVM) method.

|      |            |                     |              |
|------|------------|---------------------|--------------|
| 81.  | ATH67957.1 | Cellular process    | Non-virulent |
| 82.  | ATH67966.1 | Cellular process    | Virulent     |
| 83.  | ATH67967.1 | Cellular process    | Virulent     |
| 84.  | ATH67969.1 | Metabolism molecule | Virulent     |
| 85.  | ATH67997.1 | Metabolism molecule | Non-virulent |
| 86.  | ATH68032.1 | Metabolism molecule | Virulent     |
| 87.  | ATH68055.1 | Virulence factor    | Virulent     |
| 88.  | ATH68061.1 | Cellular process    | Non-virulent |
| 89.  | ATH68062.1 | Metabolism molecule | Virulent     |
| 90.  | ATH68063.1 | Cellular process    | Virulent     |
| 91.  | ATH68075.1 | Cellular process    | Non-virulent |
| 92.  | ATH68076.1 | Cellular process    | Non-virulent |
| 93.  | ATH68077.1 | Cellular process    | Virulent     |
| 94.  | ATH68089.1 | Metabolism molecule | Virulent     |
| 95.  | ATH68112.1 | Cellular process    | Non-virulent |
| 96.  | ATH68113.1 | Cellular process    | Non-virulent |
| 97.  | ATH70578.1 | Metabolism molecule | Virulent     |
| 98.  | ATH68125.1 | Cellular process    | Non-virulent |
| 99.  | ATH68140.1 | Metabolism molecule | Non-virulent |
| 100. | ATH68145.1 | Metabolism molecule | Non-virulent |
| 101. | ATH68146.1 | Metabolism molecule | Non-virulent |
| 102. | ATH68152.1 | Cellular process    | Virulent     |
| 103. | ATH68154.1 | Metabolism molecule | Virulent     |
| 104. | ATH68182.1 | Metabolism molecule | Virulent     |
| 105. | ATH68188.1 | Cellular process    | Non-virulent |
| 106. | ATH68190.1 | Cellular process    | Virulent     |
| 107. | ATH68203.1 | Metabolism molecule | Virulent     |
| 108. | ATH68230.1 | Cellular process    | Virulent     |

Supplementary Table 4- Virulence factor prediction of the 246 HP's. Prediction and analysis was done using bioinformatic tools like VICMpred and VirulentPred which are based on PSI-Blast and Support Vector Machine (SVM) method.

|      |            |                     |              |
|------|------------|---------------------|--------------|
| 109. | ATH68234.1 | Cellular process    | Non-virulent |
| 110. | ATH68239.1 | Cellular process    | Non-virulent |
| 111. | ATH68240.1 | Cellular process    | Virulent     |
| 112. | ATH68248.1 | Metabolism molecule | Virulent     |
| 113. | ATH68250.1 | Cellular process    | Non-virulent |
| 114. | ATH68272.1 | Cellular process    | Virulent     |
| 115. | ATH68293.1 | Cellular process    | Non-virulent |
| 116. | ATH68294.1 | Metabolism molecule | Non-virulent |
| 117. | ATH68297.1 | Metabolism molecule | Virulent     |
| 118. | ATH68320.1 | Cellular process    | Non-virulent |
| 119. | ATH68327.1 | Metabolism molecule | Virulent     |
| 120. | ATH68340.1 | Cellular process    | Virulent     |
| 121. | ATH68357.1 | Cellular process    | Virulent     |
| 122. | ATH68374.1 | Metabolism molecule | Virulent     |
| 123. | ATH70596.1 | Virulence factor    | Virulent     |
| 124. | ATH68421.1 | Metabolism molecule | Non-virulent |
| 125. | ATH68460.1 | Cellular process    | Virulent     |
| 126. | ATH68471.1 | Cellular process    | Non-virulent |
| 127. | ATH68472.1 | Cellular process    | Virulent     |
| 128. | ATH68473.1 | Metabolism molecule | Non-virulent |
| 129. | ATH68497.1 | Metabolism molecule | Non-virulent |
| 130. | ATH68515.1 | Metabolism molecule | Non-virulent |
| 131. | ATH68531.1 | Metabolism molecule | Non-virulent |
| 132. | ATH68551.1 | Cellular process    | Virulent     |
| 133. | ATH68606.1 | Metabolism molecule | Virulent     |
| 134. | ATH68609.1 | Metabolism molecule | Virulent     |
| 135. | ATH68611.1 | Virulence factor    | Virulent     |
| 136. | ATH68620.1 | Cellular process    | Virulent     |

Supplementary Table 4- Virulence factor prediction of the 246 HP's. Prediction and analysis was done using bioinformatic tools like VICMpred and VirulentPred which are based on PSI-Blast and Support Vector Machine (SVM) method.

|      |            |                         |              |
|------|------------|-------------------------|--------------|
| 137. | ATH68658.1 | Cellular process        | Virulent     |
| 138. | ATH68659.1 | Metabolism molecule     | Non-virulent |
| 139. | ATH68662.1 | Metabolism molecule     | Non-virulent |
| 140. | ATH68680.1 | Metabolism molecule     | Non-virulent |
| 141. | ATH68691.1 | Cellular process        | Virulent     |
| 142. | ATH68709.1 | Metabolism molecule     | Non-virulent |
| 143. | ATH68713.1 | Metabolism molecule     | Virulent     |
| 144. | ATH68737.1 | Cellular process        | Virulent     |
| 145. | ATH68741.1 | Cellular process        | Virulent     |
| 146. | ATH68742.1 | Cellular process        | Virulent     |
| 147. | ATH68747.1 | Cellular process        | Virulent     |
| 148. | ATH68756.1 | Metabolism molecule     | Virulent     |
| 149. | ATH68766.1 | Cellular process        | Virulent     |
| 150. | ATH70611.1 | Cellular process        | Virulent     |
| 151. | ATH68777.1 | Information and Storage | Non-virulent |
| 152. | ATH68793.1 | Metabolism molecule     | Non-virulent |
| 153. | ATH68830.1 | Metabolism molecule     | Non-virulent |
| 154. | ATH68837.1 | Metabolism molecule     | Virulent     |
| 155. | ATH68856.1 | Cellular process        | Virulent     |
| 156. | ATH68864.1 | Cellular process        | Non-virulent |
| 157. | ATH68917.1 | Cellular process        | Non-virulent |
| 158. | ATH68929.1 | Metabolism molecule     | Virulent     |
| 159. | ATH68931.1 | Metabolism molecule     | Non-virulent |
| 160. | ATH68947.1 | Metabolism molecule     | Non-virulent |
| 161. | ATH68957.1 | Metabolism molecule     | Virulent     |
| 162. | ATH68961.1 | Cellular process        | Virulent     |
| 163. | ATH68975.1 | Cellular process        | Non-virulent |
| 164. | ATH69025.1 | Cellular process        | Non-virulent |

Supplementary Table 4- Virulence factor prediction of the 246 HP's. Prediction and analysis was done using bioinformatic tools like VICMpred and VirulentPred which are based on PSI-Blast and Support Vector Machine (SVM) method.

|      |            |                     |              |
|------|------------|---------------------|--------------|
| 165. | ATH69052.1 | Cellular process    | Virulent     |
| 166. | ATH69068.1 | Cellular process    | Non-virulent |
| 167. | ATH69109.1 | Metabolism molecule | Non-virulent |
| 168. | ATH69124.1 | Metabolism molecule | Virulent     |
| 169. | ATH69181.1 | Cellular process    | Non-virulent |
| 170. | ATH69187.1 | Metabolism molecule | Non-virulent |
| 171. | ATH69209.1 | Metabolism molecule | Non-virulent |
| 172. | ATH69239.1 | Cellular process    | Virulent     |
| 173. | ATH69259.1 | Cellular process    | Non-virulent |
| 174. | ATH69265.1 | Cellular process    | Virulent     |
| 175. | ATH69300.1 | Metabolism molecule | Non-virulent |
| 176. | ATH69301.1 | Metabolism molecule | Non-virulent |
| 177. | ATH69313.1 | Metabolism molecule | Non-virulent |
| 178. | ATH69314.1 | Metabolism molecule | Non-virulent |
| 179. | ATH69322.1 | Cellular process    | Virulent     |
| 180. | ATH69323.1 | Metabolism molecule | Virulent     |
| 181. | ATH69359.1 | Cellular process    | Virulent     |
| 182. | ATH69360.1 | Cellular process    | Virulent     |
| 183. | ATH69408.1 | Cellular process    | Non-virulent |
| 184. | ATH69432.1 | Metabolism molecule | Non-virulent |
| 185. | ATH69450.1 | Metabolism molecule | Virulent     |
| 186. | ATH69450.1 | Metabolism molecule | Non-virulent |
| 187. | ATH69519.1 | Metabolism molecule | Non-virulent |
| 188. | ATH69527.1 | Cellular process    | Non-virulent |
| 189. | ATH69530.1 | Cellular process    | Virulent     |
| 190. | ATH69548.1 | Cellular process    | Virulent     |
| 191. | ATH69552.1 | Cellular process    | Virulent     |

Supplementary Table 4- Virulence factor prediction of the 246 HP's. Prediction and analysis was done using bioinformatic tools like VICMpred and VirulentPred which are based on PSI-Blast and Support Vector Machine (SVM) method.

|      |            |                         |              |
|------|------------|-------------------------|--------------|
| 192. | ATH69554.1 | Cellular process        | Virulent     |
| 193. | ATH69573.1 | Cellular process        | Non-virulent |
| 194. | ATH69585.1 | Cellular process        | Non-virulent |
| 195. | ATH69653.1 | Information and Storage | Non-virulent |
| 196. | ATH69662.1 | Metabolism molecule     | Non-virulent |
| 197. | ATH69677.1 | Metabolism molecule     | Non-virulent |
| 198. | ATH69683.1 | Metabolism molecule     | Virulent     |
| 199. | ATH69717.1 | Metabolism molecule     | Non-virulent |
| 200. | ATH69741.1 | Metabolism molecule     | Non-virulent |
| 201. | ATH69743.1 | Cellular process        | Non-virulent |
| 202. | ATH69744.1 | Cellular process        | Virulent     |
| 203. | ATH69782.1 | Cellular process        | Virulent     |
| 204. | ATH70654.1 | Cellular process        | Virulent     |
| 205. | ATH69795.1 | Cellular process        | Virulent     |
| 206. | ATH69815.1 | Cellular process        | Non-virulent |
| 207. | ATH69824.1 | Cellular process        | Non-virulent |
| 208. | ATH69836.1 | Metabolism molecule     | Non-virulent |
| 209. | ATH69872.1 | Cellular process        | Virulent     |
| 210. | ATH70659.1 | Cellular process        | Non-virulent |
| 211. | ATH70660.1 | Cellular process        | Virulent     |
| 212. | ATH69906.1 | Metabolism molecule     | Non-virulent |
| 213. | ATH69913.1 | Metabolism molecule     | Non-virulent |
| 214. | ATH69954.1 | Cellular process        | Non-virulent |
| 215. | ATH69997.1 | Cellular process        | Virulent     |
| 216. | ATH70006.1 | Cellular process        | Non-virulent |
| 217. | ATH70008.1 | Cellular process        | Non-virulent |
| 218. | ATH70042.1 | Cellular process        | Non-virulent |
| 219. | ATH70056.1 | Cellular process        | Virulent     |



Supplementary Table 4- Virulence factor prediction of the 246 HP's. Prediction and analysis was done using bioinformatic tools like VICMpred and VirulentPred which are based on PSI-Blast and Support Vector Machine (SVM) method.

|      |            |                     |              |
|------|------------|---------------------|--------------|
| 220. | ATH70067.1 | Cellular process    | Virulent     |
| 221. | ATH70101.1 | Cellular process    | Non-virulent |
| 222. | ATH70117.1 | Metabolism molecule | Non-virulent |
| 223. | ATH70671.1 | Cellular process    | Virulent     |
| 224. | ATH70198.1 | Cellular process    | Non-virulent |
| 225. | ATH70203.1 | Cellular process    | Non-virulent |
| 226. | ATH70213.1 | Metabolism molecule | Non-virulent |
| 227. | ATH70218.1 | Metabolism molecule | Virulent     |
| 228. | ATH70219.1 | Cellular process    | Virulent     |
| 229. | ATH70237.1 | Cellular process    | Virulent     |
| 230. | ATH70244.1 | Cellular process    | Non-virulent |
| 231. | ATH70274.1 | Virulence factor    | Virulent     |
| 232. | ATH70275.1 | Virulence factor    | Virulent     |
| 233. | ATH70277.1 | Cellular process    | Non-virulent |
| 234. | ATH70286.1 | Cellular process    | Virulent     |
| 235. | ATH70287.1 | Cellular process    | Non-virulent |
| 236. | ATH70326.1 | Cellular process    | Non-virulent |
| 237. | ATH70347.1 | Cellular process    | Non-virulent |
| 238. | ATH70373.1 | Cellular process    | Virulent     |
| 239. | ATH70395.1 | Cellular process    | Non-virulent |
| 240. | ATH70424.1 | Cellular process    | Non-virulent |
| 241. | ATH70426.1 | Cellular process    | Virulent     |
| 242. | ATH70436.1 | Cellular process    | Virulent     |
| 243. | ATH70444.1 | Cellular process    | Virulent     |
| 244. | ATH70449.1 | Cellular process    | Virulent     |
| 245. | ATH70469.1 | Cellular process    | Non-virulent |
| 246. | ATH70687.1 | Cellular process    | Non-virulent |
