# Supplementary material for: Functional Annotation and Curation of Hypothetical Proteins Present in A Newly Emerged Serotype 1c of Shigella flexneri: Emphasis on Selecting Targets for Virulence and Vaccine Design Studies
Source: MDPI journal article supplement (doi:10.3390/genes11030340), 2020-03-23
Supplement: s1 [file s1]

Supplementary Table 1- Functional domain analysis of 247 HP's present *S. flexneri* 1c Y394, using four bioinformatics tools namely CDD-BLAST, Pfam, InterProScan, and SCANPROSITE.

| S.No | Start-Stop/<br>Acc ID | Protein ID | BlastP result                                                                   | Functional Domain-<br>CDD-BLAST/Pfam/Uniprot/InterProScan |
|------|-----------------------|------------|---------------------------------------------------------------------------------|-----------------------------------------------------------|
| 1.   | 11355-10642           | ATH66527.1 | msyB Acidic protein                                                             | DUFF 3944; Ubic_cyt_C_chap ; YaaW family                  |
| 2.   | 128912-128004         | ATH66629.1 | Membrane protein                                                                | DUF3300                                                   |
| 3.   | 134568-134221         | ATH66635.1 | YaaC like Chaperone lipoprotein;                                                | PulS_OutS; T2SS_PulS_OutS                                 |
| 4.   | 142577-143806         | ATH66643.1 | Polysaccharide deacetylase family protein; Putative xylanase/chitin deacetylase | CE4_yadE_5s;deacetyl_PgaB;CDA1;Polysacc_deac_1;hms F      |
| 5.   | 168637-168014         | ATH66665.1 | TRIC cation channel family protein                                              | PRK10578; YadS; UPF0126                                   |
| 6.   | 204589-205134         | ATH66697.1 | Transcription elongation protein; Nucleic acid binding protein;                 | YaeQ                                                      |
| 7.   | 207256-206432         | ATH66700.1 | YaeF family permuted papain like enzyme; Putative lipoprotein                   | NLPC_P60; Spr; Peptidase_C92                              |
| 8.   | 257524-257832         | ATH66742.1 | Integral inner membrane protein                                                 | DUF 2755                                                  |
| 9.   | 258985-257891         | ATH66743.1 | Putative lipoprotein; surface-exposed outer membrane lipoprotein YaiW           | DUF1615                                                   |
| 10.  | 278459-277740         | ATH66760.1 | Fe-S protein                                                                    | GlpC; PRK06259; CCG; glycerol3P_GlpC                      |
| 11.  | 332801-332989         | ATH66809.1 | Protein YaiA- always immediately downstream of a                                | YaiA                                                      |

Supplementary Table 1- Functional domain analysis of 247 HP's present *S. flexneri* 1c Y394, using four bioinformatics tools namely CDD-BLAST, Pfam, InterProScan, and SCANPROSITE.

|     |               |            |                                                                                       |                                              |
|-----|---------------|------------|---------------------------------------------------------------------------------------|----------------------------------------------|
|     |               |            | Shikimate kinase.                                                                     |                                              |
| 12. | 333999-334283 | ATH66812.1 | Pyrimidine/Purine nucleoside phosphorylase                                            | YaiA; DUF1255                                |
| 13. | 375122-372969 | ATH66845.1 | tetratricopeptide repeat protein; YwqK family antitoxin-E; Sel1 repeat family protein | Sel1; Ywqk                                   |
| 14. | 385847-385269 | ATH66856.1 | Putative Lipoprotein                                                                  | YajG;Lipoprotein_16                          |
| 15. | 395618-395989 | ATH66865.1 | Competence ComEA helix-hairpin-helix repeat region domain protein                     | ComEA                                        |
| 16. | 398867-397293 | ATH66868.1 | SgrR family transcriptional regulator                                                 | SgrR_N; PBP2_Nika_DppA_oppA_like Superfamily |
| 17. | 407052-407624 | ATH66876.1 | Lipoprotein; Chaperone lipoprotein for Oligomerisation                                | YscW; YbaY                                   |
| 18. | 412362-411892 | ATH66880.1 | Inner Membrane protein YlaC                                                           | YlaC family                                  |
| 19. | 441081-440287 | ATH66907.1 | Ligase; gumN family protein                                                           | TraB; MopB_Thiosulfate-R-like family         |
| 20. | 447759-447301 | ATH66913.1 | NfeD family protein (Nodulation efficiency protein)                                   | NfeD; CobS; YbbJ                             |
| 21. | 474791-475309 | ATH66937.1 | Fimbrial biogenesis outer membrane usher protein precursor                            | PapC_N; FimD;PRK15198;PapC_N; Usher Family   |
| 22. | 478463-477573 | ATH66941.1 | DUF4434 family protein; AmyAc_family superfamily - Alpha Amylase                      | DUF4434                                      |

Supplementary Table 1- Functional domain analysis of 247 HP's present *S. flexneri* 1c Y394, using four bioinformatics tools namely CDD-BLAST, Pfam, InterProScan, and SCANPROSITE.

|     |               |            |                                                                    |                                                |
|-----|---------------|------------|--------------------------------------------------------------------|------------------------------------------------|
| 23. | 501451-501083 | ATH66955.1 | MmcQ/YjbR family DNA-binding protein                               | YjbR                                           |
| 24. | 531057-531254 | ATH66978.1 | YbdD/YjiX family protein; Putative selenoprotein                   | YbdD; Sel_put                                  |
| 25. | 603063-605168 | ATH67045.1 | Putative Fimbrial biogenesis outer membrane usher protein          | FimD fam; Usher fam                            |
| 26. | 606337-606987 | ATH67048.1 | Putative fimbrial-like adhesin protein; Type 1 fimbrial protein    | Fimbrial fam and superfam                      |
| 27. | 611315-610659 | ATH67052.1 | 5-oxoprolinase subunit PxpB; Putative carboxylase                  | CT_C_D superfamily                             |
| 28. | 641178-640852 | ATH67074.1 | Putative lipoprotein; YbfN-like lipofamily protein                 | YbfN family                                    |
| 29. | 670249-669542 | ATH67096.1 | DUF1266 domain-containing protein; Putative trna ligase            | DUF1266                                        |
| 30. | 673046-672339 | ATH67099.1 | DUF1266 domain-containing protein; Putative trna ligase - shigella | DUF1266                                        |
| 31. | 673210-674187 | ATH67100.1 | Sel1 family TPR-like repeat protein YbeQ                           | Sel1 superfamily                               |
| 32. | 687116-687379 | ATH67113.1 | DUF493 family protein; Proposed lipoate regulatory protein YbeD    | DUF493                                         |
| 33. | 734084-734506 | ATH67162.1 | YdaT_toxin Protein                                                 | YdaT_toxin                                     |
| 34. | 737140-737805 | ATH67165.1 | Epoxyqueuosine reductase QueH                                      | (AANH) superfamily                             |
| 35. | 745414-       | ATH67175.1 | replication protein P; toprim                                      | Torpim_N; DnaB_C; D5_N; DnaG; Intein_splicing; |

Supplementary Table 1- Functional domain analysis of 247 HP's present *S. flexneri* 1c Y394, using four bioinformatics tools namely CDD-BLAST, Pfam, InterProScan, and SCANPROSITE.

|     |                   |            |                                                                                    |                                                            |
|-----|-------------------|------------|------------------------------------------------------------------------------------|------------------------------------------------------------|
|     | 747255            |            | domain-containing protein;<br>bifunctional DNA<br>primase/helicase                 | Toprim_2                                                   |
| 36. | 748748-<br>749572 | ATH70531.1 | replication protein P;<br>bifunctional DNA<br>primase/helicase                     | RecA-like_NTPases; P-loop_NTPase; AAA_25;<br>GP4d_helicase |
| 37. | 751108-<br>750845 | ATH67180.1 | type II toxin-antitoxin system<br>RelE/ParE family toxin; Prophage<br>protein Gp49 | Par_E toxin; Gp 49                                         |
| 38. | 799673-<br>798765 | ATH67230.1 | Uridine diphosphate-N-<br>acetylglucosamine-binding<br>protein YvcK                | CofD_YvcK superfamily                                      |
| 39. | 802910-<br>803614 | ATH67236.1 | Bax inhibitor-1/YccA family<br>protein; Inner membrane<br>protein- YbhL protein    | BAX inhibitor (BI)-1/YccA-like protein family              |
| 40. | 807656-<br>808066 | ATH67241.1 | Putative Inner membrane<br>protein                                                 | YbhQ                                                       |
| 41. | 875709-<br>876086 | ATH67298.1 | Inner membrane protein YbjM                                                        | YbjM                                                       |
| 42. | 876533-<br>876820 | ATH67300.1 | DUF1418 Membrane protein                                                           | DUF1418 superfamily; YbjC                                  |
| 43. | 878577-<br>879053 | ATH67303.1 | YbjN domain-containing protein;<br>Putative sensory transduction<br>regulator      | YbjN                                                       |
| 44. | 883610-<br>884098 | ATH67308.1 | DUF2593 family Inner<br>membrane protein                                           | DUF2593                                                    |
| 45. | 892694-           | ATH67318.1 | Heavy metal-binding domain-                                                        | YbjQ_1                                                     |

Supplementary Table 1- Functional domain analysis of 247 HP's present *S. flexneri* 1c Y394, using four bioinformatics tools namely CDD-BLAST, Pfam, InterProScan, and SCANPROSITE.

|     |                 |            |                                                                                                |                                              |
|-----|-----------------|------------|------------------------------------------------------------------------------------------------|----------------------------------------------|
|     | 893017          |            | containing protein                                                                             |                                              |
| 46. | 893841-894854   | ATH70538.1 | NAD(P)-dependent oxidoreductase; Putative nucleotide di-P-sugar epimerase or dehydratase;      | Fab1; Epimerase superfamily; SDR superfamily |
| 47. | 902958-902059   | ATH67325.1 | L-lysine exporter LysO; Putative surface protein                                               | DUF 340; YbjE family                         |
| 48. | 965544-965726   | ATH67371.1 | Protein YcaR; tRNA methylation protein                                                         | Trm112p-like protein superfamily             |
| 49. | 966623-967516   | ATH67373.1 | Kinase Protein                                                                                 | PKc-like superfamily                         |
| 50. | 979384-979932   | ATH70540.1 | DUF882 domain-containing protein; Exported protein YcbK; tat (twin-arginine translocation)     | Peptidase_M15_2                              |
| 51. | 1005190-1004081 | ATH67401.1 | 6-N-hydroxylaminopurine resistance protein YcbX ; Ion binding protein.                         | MOSC_N; Fer2 superfamily                     |
| 52. | 1012486-1013049 | ATH67406.1 | Membrane integrity-associated transporter subunit PqiC                                         | ABC_trans_aux superfamily                    |
| 53. | 1022791-1022345 | ATH67413.1 | YccF domain-containing Inner membrane protein                                                  | YccF superfamily                             |
| 54. | 1047132-1046386 | ATH67436.1 | Group 4 capsule (G4C) polysaccharide, YmcB protein                                             | Caps_Synth_GfcC superfamily                  |
| 55. | 1081427-1081918 | ATH67468.1 | DUF1097 domain-containing protein Inner membrane protein YcdZ; Putative Amino acid transporter | DUF1079                                      |

Supplementary Table 1- Functional domain analysis of 247 HP's present *S. flexneri* 1c Y394, using four bioinformatics tools namely CDD-BLAST, Pfam, InterProScan, and SCANPROSITE.

|     |                 |            |                                                                                                  |                                           |
|-----|-----------------|------------|--------------------------------------------------------------------------------------------------|-------------------------------------------|
| 56. | 1155999-1156376 | ATH67536.1 | DUF1425 domain-containing protein; putative periplasmic lipoprotein                              | DUF1425 superfam; YcfL fam                |
| 57. | 1158896-1159438 | ATH67540.1 | Alpha/beta hydrolase                                                                             | Abhydrolase superfamily                   |
| 58. | 1168941-1167868 | ATH67546.1 | Putative acyltransferase family protein                                                          | Acyl_transf_3; DUF418 superfamily         |
| 59. | 1218563-1219024 | ATH67604.1 | Putative cytoplasmic protein YcgN; YcgN family cysteine cluster protein                          | CxxCxxCC superfamily                      |
| 60. | 1258534-1258812 | ATH67634.1 | Stress-induced protein YchH                                                                      | DUF2583 superfamily                       |
| 61. | 1272263-1271910 | ATH67647.1 | DsrE/F sulfur relay family protein YchN; Putative ACR involved in intracellular sulfur reduction | DrsE superfamily                          |
| 62. | 1309262-1308966 | ATH67677.1 | Ycil family protein; Putative cytoplasmic protein Ycil                                           | Ycil superfamily                          |
| 63. | 1314420-1314241 | ATH67684.1 | Putative cytoplasmic protein; YciG stress induced protein.                                       | GsiB superfamily; KGG superfamily         |
| 64. | 1348093-1347740 | ATH67716.1 | DUF559 domain-containing protein; Restriction endonuclease                                       | Restriction_endonuclease_like superfamily |
| 65. | 1378871-1379551 | ATH67743.1 | Monomeric porin OmpG; outer membrane porin OmpG                                                  | Porin_OmpG                                |
| 66. | 1379576-1379743 | ATH67744.1 | Outer membrane porin OmpG domain protein; OmpG prot                                              | Porin_OmpG                                |

Supplementary Table 1- Functional domain analysis of 247 HP's present *S. flexneri* 1c Y394, using four bioinformatics tools namely CDD-BLAST, Pfam, InterProScan, and SCANPROSITE.

|     |                 |            |                                                                                                                               |                                                 |
|-----|-----------------|------------|-------------------------------------------------------------------------------------------------------------------------------|-------------------------------------------------|
|     |                 |            | precursor protein                                                                                                             |                                                 |
| 67. | 1381008-1382405 | ATH67746.1 | YcjX family protein; Putative ATP-binding protein                                                                             | DUF463                                          |
| 68. | 1444751-1444512 | ATH67804.1 | Membrane protein; YobH-like family protein                                                                                    | YobH-like family protein                        |
| 69. | 1448042-1447422 | ATH67810.1 | Manganese efflux pump MntP; Putative YebN family transport protein                                                            | Mntp                                            |
| 70. | 1461081-1460737 | ATH70565.1 | RidA family protein; RutC family protein yoaB; putative translation initiation inhibitor, yjgF family; endoribonuclease L-PSP | YjgF_YER057c_UK114_like_2 superfamily           |
| 71. | 1463916-1464497 | ATH67825.1 | Slp family lipoprotein YeaY                                                                                                   | Slp superfamily                                 |
| 72. | 1470396-1470494 | ATH67828.1 | Putative transcriptional regulator                                                                                            | HTH_XRE superfamily                             |
| 73. | 1495060-1496100 | ATH67852.1 | DUF1266 domain-containing protein; Inner membrane protein Ynjl                                                                | DUF1266                                         |
| 74. | 1498524-1499144 | ATH67855.1 | CDP-alcohol phosphatidyltransferase family protein                                                                            | CDP-alcohol phosphatidyltransferase superfamily |
| 75. | 1531832-1532368 | ATH67883.1 | Integral membrane protein                                                                                                     | YniB superfamily                                |
| 76. | 1533665-1533375 | ATH67885.1 | Endoribonuclease GhoS                                                                                                         | GhoS superfamily                                |

Supplementary Table 1- Functional domain analysis of 247 HP's present *S. flexneri* 1c Y394, using four bioinformatics tools namely CDD-BLAST, Pfam, InterProScan, and SCANPROSITE.

|     |                 |            |                                                                                               |                             |
|-----|-----------------|------------|-----------------------------------------------------------------------------------------------|-----------------------------|
| 77. | 1535759-1536517 | ATH67887.1 | DUF481 domain-containing protein; Salt/Acid induced outer membrane protein                    | DUF481                      |
| 78. | 1573122-1573478 | ATH67921.1 | RusA family crossover junction endodeoxyribonuclease; Holliday junction resolvase             | RusA                        |
| 79. | 1585388-1584870 | ATH67934.1 | 2-oxo-tetronate isomerase                                                                     | CinA                        |
| 80. | 1601251-1602165 | ATH67952.1 | Putative membrane protein; bestrophin- RFP-TM; Chloride channel family protein                | Bestrophin superfamily      |
| 81. | 1606541-1606254 | ATH67957.1 | Autoinducer 2 ABC transporter substrate-binding protein                                       | XlyF                        |
| 82. | 1616723-1616397 | ATH67966.1 | YnfA family protein; Putative membrane spanning protein; Putative inner membrane lipoprotein; | UPF0060                     |
| 83. | 1616858-1617199 | ATH67967.1 | DUF1283 family protein; YnfB lipoprotein                                                      | DUF1283                     |
| 84. | 1618615-1618920 | ATH67969.1 | DUF1161 domain-containing protein; YnfD lipoprotein                                           | DUF1161                     |
| 85. | 1648406-1648071 | ATH67997.1 | GlpM family protein; Inner membrane protein associated with alginate biosynthesis             | GlpM                        |
| 86. | 1689668-1690135 | ATH68032.1 | Outer membrane lipoprotein SlyB                                                               | Rick_17kDA_anti superfamily |
| 87. | 1717506-        | ATH68055.1 | Autotransporter;                                                                              | AIDA superfamily            |



Supplementary Table 1- Functional domain analysis of 247 HP's present *S. flexneri* 1c Y394, using four bioinformatics tools namely CDD-BLAST, Pfam, InterProScan, and SCANPROSITE.

|     |                 |            |                                                                                                       |                                                  |
|-----|-----------------|------------|-------------------------------------------------------------------------------------------------------|--------------------------------------------------|
|     | 1716250         |            | Autotransporter adhesin-related protein                                                               |                                                  |
| 88. | 1723103-1722456 | ATH68061.1 | YdhW family putative oxidoreductase system protein                                                    | PRK09947 superfamily                             |
| 89. | 1725855-1725229 | ATH68062.1 | ferredoxin-like protein;                                                                              | DMSOR_beta_like superfamily                      |
| 90. | 1726520-1726311 | ATH68063.1 | fumarate hydratase FumD; Sulfur acceptor that activates SufS cysteine desulfurase                     | DUF2767                                          |
| 91. | 1740839-1737783 | ATH68075.1 | FAD-binding oxidoreductase                                                                            | CCG superfam; FAD- oxidase_C superfamily         |
| 92. | 1741228-1742340 | ATH68076.1 | AI-2E family transporter YdiK                                                                         | AI-2E family transporter superfamily             |
| 93. | 1742769-1743125 | ATH68077.1 | DUF1870 family protein-putative DNA binding protein                                                   | DUF1870 superfamily                              |
| 94. | 1761937-1763256 | ATH68089.1 | Glycoside hydrolase family 10 protein                                                                 | YddW superfamily                                 |
| 95. | 1796710-1797159 | ATH68112.1 | DMT family transporter - drug/metabolite transporter                                                  | EamA superfamily                                 |
| 96. | 1797393-1797160 | ATH68113.1 | DUF2526 domain-containing protein; putative cytoplasmic protein; Extracellular solute-binding protein | DUF2526                                          |
| 97. | 1797700-1797479 | ATH70578.1 | GhoT/OrtT family toxin; YdcX inner membrane protein                                                   | Toxin_GhoT_OrtT domain-containing protein family |
| 98. | 1809312-1810154 | ATH68125.1 | Acetyltransferase; Putative transferase; LbetaH domain-                                               | LbetaH superfamily                               |

Supplementary Table 1- Functional domain analysis of 247 HP's present *S. flexneri* 1c Y394, using four bioinformatics tools namely CDD-BLAST, Pfam, InterProScan, and SCANPROSITE.

|      |                 |            |                                                                                   |                                          |
|------|-----------------|------------|-----------------------------------------------------------------------------------|------------------------------------------|
|      |                 |            | containing protein                                                                |                                          |
| 99.  | 1826138-1825638 | ATH68140.1 | YdcF family protein; Protein binding with S-adenosyl-L-methionine (AdoMet).       | YdcF - like superfamily                  |
| 100. | 1837928-1836171 | ATH68145.1 | alpha/beta fold hydrolase; Putative hydrolase                                     | Abhydrolase_1; AdoMet_MTases superfamily |
| 101. | 1839444-1838839 | ATH68146.1 | CDP-alcohol phosphatidyltransferase family protein                                | CDP-alcohol phosphatidyltransferase      |
| 102. | 1848256-1848582 | ATH68152.1 | DUF1318 domain-containing protein; YnbE family lipoprotein                        | DUF1318                                  |
| 103. | 1850130-1849864 | ATH68154.1 | Putative hemolysin; DUF333 domain-containing protein                              | DUF 333; RlpA superfamily                |
| 104. | 1889630-1889256 | ATH68182.1 | CopC domain-containing protein YobA- copper ion transport and copper ion response | Big_5 superfamily                        |
| 105. | 1895052-1894696 | ATH68188.1 | Protein YebF- colicin immunity protein.                                           | YebF superfamily                         |
| 106. | 1895409-1895287 | ATH68190.1 | DNA damage-inducible protein YebG                                                 | YebG superfamily                         |
| 107. | 1910912-1911514 | ATH68203.1 | YebB family permuted papain-like enzyme                                           | NLPC_P60                                 |
| 108. | 1939210-1938851 | ATH68230.1 | RusA family crossover junction endodeoxyribonuclease                              | RusA                                     |
| 109. | 1942685-1943254 | ATH68234.1 | DNA polymerase III beta subunit, central domain protein                           | beta_clamp superfamily                   |
| 110. | 1945349-        | ATH68239.1 | DUF72 domain-containing                                                           | DUF72                                    |

Supplementary Table 1- Functional domain analysis of 247 HP's present *S. flexneri* 1c Y394, using four bioinformatics tools namely CDD-BLAST, Pfam, InterProScan, and SCANPROSITE.

|      |                 |            |                                                                                                                            |                            |
|------|-----------------|------------|----------------------------------------------------------------------------------------------------------------------------|----------------------------|
|      | 1945699         |            | protein; Inner membrane protein yecN; Putative cytosolic protein                                                           |                            |
| 111. | 1945752-1946147 | ATH68240.1 | Inner membrane protein YecN;                                                                                               | MAPEG superfamily          |
| 112. | 1955458-1955946 | ATH68248.1 | Lysozyme inhibitor LprI family protein                                                                                     | DUF1311; YecT family       |
| 113. | 1961217-1961675 | ATH68250.1 | dNTP triphosphohydrolase                                                                                                   | YdhJ; HDc superfamily      |
| 114. | 1986617-1986940 | ATH68272.1 | Putative Lipoprotein                                                                                                       | YecR                       |
| 115. | 2006346-2005933 | ATH68293.1 | YedD lipoprotein                                                                                                           | YedD                       |
| 116. | 2006533-2007738 | ATH68294.1 | Selenium metabolism membrane protein YedE/FdhT                                                                             | Sulf_transp superfamily    |
| 117. | 2013934-2013383 | ATH68297.1 | Raf kinase inhibitor-like protein YbcL; Kinase inhibitor                                                                   | PEPB superfamily           |
| 118. | 2027908-2028309 | ATH68320.1 | HAD-IIB family hydrolase; mannosyl-3-phosphoglycerate phosphatase; mannosyl-3-phosphoglycerate phosphatase-related protein | YedP; HAD-like superfamily |
| 119. | 2035144-2034947 | ATH68327.1 | Permease; Inner membrane protein YedR                                                                                      | djIA                       |
| 120. | 2053556-2053191 | ATH68340.1 | RusA family crossover junction endodeoxyribonuclease                                                                       | RusA                       |
| 121. | 2079232-        | ATH68357.1 | RusA family crossover junction                                                                                             | RusA                       |

Supplementary Table 1- Functional domain analysis of 247 HP's present *S. flexneri* 1c Y394, using four bioinformatics tools namely CDD-BLAST, Pfam, InterProScan, and SCANPROSITE.

|      |                 |            |                                                                                              |                                                               |
|------|-----------------|------------|----------------------------------------------------------------------------------------------|---------------------------------------------------------------|
|      | 2078867         |            | endodeoxyribonuclease                                                                        |                                                               |
| 122. | 2096882-2096655 | ATH68374.1 | SirA family protein; Sulfurtransferase TusA                                                  | TusA                                                          |
| 123. | 2116885-2116394 | ATH70596.1 | Glycosyltransferase; Putative dolichol-phosphate mannosyltransferase; protein rfbJ;          | Glyco_tranf_GTA-type superfamily                              |
| 124. | 2155614-2156063 | ATH68421.1 | Diguanylate cyclase; putative sensor protein; PAS domain S-box protein                       | COG5001                                                       |
| 125. | 2203928-2203404 | ATH68460.1 | Type 1 fimbrial protein; YehD protein; fimbrial-like adhesin protein                         | Fimbrial superfamily                                          |
| 126. | 2222052-2223188 | ATH68471.1 | Mg-chelatase subunit ChlD; VWA domain-containing protein                                     | beta_Kdo_transferase; VWA_YIEM_type domain-containing protein |
| 127. | 2223185-2225188 | ATH68472.1 | Peptidase                                                                                    | Peptidase family C69                                          |
| 128. | 2226089-2226550 | ATH68473.1 | DUF1307 domain-containing protein; lipoprotein                                               | DUF1307; YehR                                                 |
| 129. | 2256512-2256910 | ATH68497.1 | Putative effector of murein hydrolase LrgA; antiholin-like protein LrgA; LrgA family protein | LrgA                                                          |
| 130. | 2275278-2276327 | ATH68515.1 | YeiH family protein; YeiH family putative sulfate export transporter                         | Cons_hypoth698                                                |
| 131. | 2295033-2295746 | ATH68531.1 | Kdo(2)-lipid A phosphotransferase; PAP2                                                      | PgpB                                                          |

Supplementary Table 1- Functional domain analysis of 247 HP's present *S. flexneri* 1c Y394, using four bioinformatics tools namely CDD-BLAST, Pfam, InterProScan, and SCANPROSITE.

|      |                 |            |                                                                                                               |                                   |
|------|-----------------|------------|---------------------------------------------------------------------------------------------------------------|-----------------------------------|
|      |                 |            | family protein                                                                                                |                                   |
| 132. | 2318104-2318313 | ATH68551.1 | Single-stranded DNA-binding protein                                                                           | Ssb; Asp_Lys-Asn_RS_N superfamily |
| 133. | 2383925-2383659 | ATH68606.1 | Adhesin AIDA-I family autotransporter; Putative outer membrane autotransporter                                | AidA sperfamily                   |
| 134. | 2389228-2388578 | ATH68609.1 | Lipopolysaccharide kinase InaA; pH-inducible protein involved in stress response (putative kinase)            | PKc_like superfamily              |
| 135. | 2389443-2389649 | ATH68611.1 | yfaH protein; LysR family transcriptional regulator                                                           | PBP2_LTTR-Substrate               |
| 136. | 2400007-2399465 | ATH68620.1 | YfaZ superfamily; Membrane protein                                                                            | YfaZ                              |
| 137. | 2443638-2443144 | ATH68658.1 | YfbU family protein; ligand binding protein                                                                   | YfbU                              |
| 138. | 2444176-2443721 | ATH68659.1 | DUF412 domain-containing protein membrane protein                                                             | DUF412                            |
| 139. | 2448125-2449645 | ATH68662.1 | putative S-transferase; putative basic amino acid antiporter YfcC; C4-dicarboxylate anaerobic carrier protein | ArsB_NhaD_permease                |
| 140. | 2465785-2465126 | ATH68680.1 | tRNA pseudouridine(38-40) synthase TruA                                                                       | PseudoU_synth                     |
| 141. | 2476615-2475806 | ATH68691.1 | Uncharacterized membrane protein YfcA                                                                         | TauE                              |
| 142. | 2497196-2498128 | ATH68709.1 | Inner membrane protein YfdC; transporter protein                                                              | Form_nir_trans_superfamily        |

Supplementary Table 1- Functional domain analysis of 247 HP's present *S. flexneri* 1c Y394, using four bioinformatics tools namely CDD-BLAST, Pfam, InterProScan, and SCANPROSITE.

|      |                 |            |                                                                                 |                             |
|------|-----------------|------------|---------------------------------------------------------------------------------|-----------------------------|
| 143. | 2503563-2503793 | ATH68713.1 | Permease DsdX; D-serine transporter DsdX ; GntP family permease                 | GntP permease               |
| 144. | 2536652-2536978 | ATH68737.1 | DUF2502 domain-containing protein; RNA recognition motif (RRM) domain           | DUF2502                     |
| 145. | 2542660-2543004 | ATH68741.1 | putative DNA-binding transcriptional regulator; helix-turn-helix family protein | DUF1323; HTH_merR_SF        |
| 146. | 2543006-2543398 | ATH68742.1 | putative DNA-binding transcriptional regulator; helix-turn-helix family protein | DUF1323; HTH_merR_SF        |
| 147. | 2548236-2548018 | ATH68747.1 | putative cytoplasmic protein; DNA polymerase III subunit epsilon                | PolC; QSregVF_b             |
| 148. | 2557418-2557792 | ATH68756.1 | Trna synthetase                                                                 | t-RNA-synt_2                |
| 149. | 2570438-2569989 | ATH68766.1 | DUF2919 domain-containing inner membrane protein                                | DUF2919                     |
| 150. | 2576465-2577085 | ATH70611.1 | Transcriptional regulator                                                       | HATPase_c_4                 |
| 151. | 2580480-2580773 | ATH68777.1 | Glutamate decarboxylase beta domain protein                                     | AAT_I                       |
| 152. | 2603582-2603782 | ATH68793.1 | YpfN family protein; Putative inner membrane prot                               | UPF0370                     |
| 153. | 2641931-2642449 | ATH68830.1 | glycine zipper 2TM domain-containing protein; membrane                          | Rick_17kDa_Anti superfamily |

Supplementary Table 1- Functional domain analysis of 247 HP's present *S. flexneri* 1c Y394, using four bioinformatics tools namely CDD-BLAST, Pfam, InterProScan, and SCANPROSITE.

|      |                 |            | protein                                                                             |                               |
|------|-----------------|------------|-------------------------------------------------------------------------------------|-------------------------------|
| 154. | 2651424-2650804 | ATH68837.1 | tetratricopeptide repeat protein                                                    | TPR_21                        |
| 155. | 2671784-2672638 | ATH68856.1 | alpha/beta hydrolase; peptidase                                                     | FrsA; Abhydrolase superfamily |
| 156. | 2680750-2681172 | ATH68864.1 | DoxX family protein; inner membrane protein YphA                                    | DoxX superfamily              |
| 157. | 2743716-2744039 | ATH68917.1 | YfiM family lipoprotein                                                             | DUF2279                       |
| 158. | 2763740-2764105 | ATH68929.1 | DUF2799 domain-containing protein; putative exonuclease ATPase subunit; lipoprotein | DUF2799                       |
| 159. | 2766004-2766486 | ATH68931.1 | OmpA family protein                                                                 | OmpA_C- like superfamily      |
| 160. | 2782729-2784981 | ATH68947.1 | Putative alpha amylase                                                              | Alpha-amylase superfamily     |
| 161. | 2795188-2795712 | ATH68957.1 | thiosulfate sulfurtransferase YgaP; Inner membrane protein with hydrolase activity  | ThiF; RHOD; DUF2892           |
| 162. | 2797814-2798044 | ATH68961.1 | DUF883 domain-containing protein- Membrane-anchored ribosome-binding protein        | DUF883                        |
| 163. | 2814611-2814183 | ATH68975.1 | DedA family inner membrane protein                                                  | DedA family                   |
| 164. | 2869170-2868847 | ATH69025.1 | DUF3561 family protein; Putative cytochrome oxidase subunit                         | DUF3561                       |

Supplementary Table 1- Functional domain analysis of 247 HP's present *S. flexneri* 1c Y394, using four bioinformatics tools namely CDD-BLAST, Pfam, InterProScan, and SCANPROSITE.

|      |                 |            |                                                                        |                                |
|------|-----------------|------------|------------------------------------------------------------------------|--------------------------------|
| 165. | 2906794-2906465 | ATH69052.1 | YqcC family protein- tRNA pseudouridine synthase C                     | DUF446                         |
| 166. | 2924914-2924519 | ATH69068.1 | DUF423 domain-containing inner membrane protein                        | DUF423                         |
| 167. | 2979755-2979000 | ATH69109.1 | LysM peptidoglycan-binding domain-containing protein; lipoprotein YgeR | Peptidase_M23                  |
| 168. | 2995934-2995527 | ATH69124.1 | Membrane protein YgfX                                                  | CptA_toxin                     |
| 169. | 3055411-3055977 | ATH69181.1 | Osmotic shock tolerance protein YggT ; integral membrane protein       | YGGT                           |
| 170. | 3060596-3061885 | ATH69187.1 | TRAP transporter, DctM subunit                                         | DctM; ArsB_NhaD_permease       |
| 171. | 3084630-3084226 | ATH69209.1 | Protein glcG                                                           | Haem_degrading superfamily     |
| 172. | 3116470-3116727 | ATH69239.1 | lipoprotein YqhH                                                       | GNVR superfam; LPP superfamily |
| 173. | 3136059-3136730 | ATH69259.1 | DUF1190 family protein; putative inner membrane protein                | DUF1190                        |
| 174. | 3141094-3141444 | ATH69265.1 | ubiquinone biosynthesis accessory factor UbiK                          | PKD_channel; BMFP superfamily  |
| 175. | 3188711-3189403 | ATH69300.1 | vancomycin high temperature exclusion protein                          | YdcF-like superfamily          |
| 176. | 3190751-3191716 | ATH69301.1 | TerC family membrane protein Alx; putative pH-induced                  | TerC                           |



Supplementary Table 1- Functional domain analysis of 247 HP's present *S. flexneri* 1c Y394, using four bioinformatics tools namely CDD-BLAST, Pfam, InterProScan, and SCANPROSITE.

|      |                 |            |                                                                                                              |                              |
|------|-----------------|------------|--------------------------------------------------------------------------------------------------------------|------------------------------|
|      |                 |            | membrane-bound redox modulator                                                                               |                              |
| 177. | 3207491-3207796 | ATH69313.1 | DUF883 domain-containing protein; membrane-anchored ribosome-binding protein; putative membrane protein YqjD | DUF 883                      |
| 178. | 3207799-3208203 | ATH69314.1 | inner membrane protein YqjE                                                                                  | YqjE family; Phage_holin_3_6 |
| 179. | 3214309-3212999 | ATH69322.1 | serine dehydratase subunit alpha family protein                                                              | SDH_alpha superfamily        |
| 180. | 3215668-3214337 | ATH69323.1 | HAAAP family serine/threonine permease; inner membrane transport protein yhaO                                | SLC5-6-like_sbd; stp family  |
| 181. | 3257093-3256458 | ATH69359.1 | NAD-dependent epimerase/dehydratase family protein                                                           | SDR superfamily              |
| 182. | 3258213-3258515 | ATH69360.1 | DNA damage response exodeoxyribonuclease YhbQ; GIY-YIG nuclease superfamily protein                          | GIY_YIG_Sf superfamily       |
| 183. | 3306661-3307293 | ATH69408.1 | PhoP regulatory network protein YrbL                                                                         | Pkinase                      |
| 184. | 3338987-3338715 | ATH69432.1 | Barnase inhibitor yhcO                                                                                       | Barstar like superfamily     |
| 185. | 3359953-3360195 | ATH69450.1 | DUF997 family protein; Inner membrane protein                                                                | DUF997                       |

Supplementary Table 1- Functional domain analysis of 247 HP's present *S. flexneri* 1c Y394, using four bioinformatics tools namely CDD-BLAST, Pfam, InterProScan, and SCANPROSITE.

|      |                 |            |                                                                                           |                                 |
|------|-----------------|------------|-------------------------------------------------------------------------------------------|---------------------------------|
| 186. | 3410714-3409992 | ATH69450.1 | Transcriptional regulator                                                                 | PAS_6                           |
| 187. | 3413066-3412866 | ATH69519.1 | YheV family putative metal-binding protein                                                | DUF2387                         |
| 188. | 3420024-3419620 | ATH69527.1 | OsmC family protein                                                                       | OsmC                            |
| 189. | 3420997-3423099 | ATH69530.1 | Integral Membrane protein                                                                 | FUSC-like superfamily           |
| 190. | 3441559-3440255 | ATH69548.1 | Integral Membrane protein                                                                 | YhfT superfamily                |
| 191. | 3445200-3444037 | ATH69552.1 | YhfX family PLP-dependent enzyme; Alanine racemase, N-terminal domain protein             | Ala_racemase_C; PLPDE_3         |
| 192. | 3445663-3446568 | ATH69554.1 | Substrate binding domain for transcriptional regulator; Periplasmic binding protein       | PBP2_LTTR_substrate superfamily |
| 193. | 3466921-3466790 | ATH69573.1 | Endoglucanase Acf2                                                                        | Glyco_hydro_81; Acf2            |
| 194. | 3479710-3479979 | ATH69585.1 | AbrB/MazE/SpoVT family DNA-binding domain-containing protein; Antitoxin E                 | MazE_antitoxin                  |
| 195. | 3557848-355915  | ATH69653.1 | HlyD family secretion protein; HlyD family efflux transporter periplasmic adaptor subunit | HlyD                            |
| 196. | 3569980-3569693 | ATH69662.1 | Outer membrane usher protein, type 1 fimbrial synthesis -                                 | Usher superfamily               |
| 197. | 3587557-        | ATH69677.1 | Glutathione reductase                                                                     | Pyr_redox_dim                   |

Supplementary Table 1- Functional domain analysis of 247 HP's present *S. flexneri* 1c Y394, using four bioinformatics tools namely CDD-BLAST, Pfam, InterProScan, and SCANPROSITE.

|      |                 |            |                                                                                       |                  |
|------|-----------------|------------|---------------------------------------------------------------------------------------|------------------|
|      | 3587793         |            |                                                                                       |                  |
| 198. | 3591828-3592790 | ATH69683.1 | Permease                                                                              | ArsP_1           |
| 199. | 3629062-3629250 | ATH69717.1 | Cellulose biosynthesis protein                                                        | CBP_BcsR; mmmC   |
| 200. | 3670435-3670136 | ATH69741.1 | Membrane protein; YsaB-like lipofamily protein                                        | YsaB             |
| 201. | 3672084-3671647 | ATH69743.1 | Inner membrane protein YiaB/A                                                         | YiaA superfamily |
| 202. | 3672471-3672130 | ATH69744.1 | Inner membrane protein YiaB-E.coli; YiaA/B two helix domain protein                   | YiaA superfamily |
| 203. | 3717974-3718336 | ATH69782.1 | YibL family ribosome-associated protein                                               | DUF2810          |
| 204. | 3718982-3719563 | ATH70654.1 | DUF3251 domain-containing protein; putative inner membrane lipoprotein.               | DUF 3251         |
| 205. | 3735337-3736296 | ATH69795.1 | divergent polysaccharide deacetylase family protein                                   | Polysacc_deac_2  |
| 206. | 3757405-3756737 | ATH69815.1 | JAB domain-containing protein; DNA repair protein RadC                                | RadC             |
| 207. | 3763722-3764339 | ATH69824.1 | putative inner membrane protein; trimeric intracellular cation channel family protein | YadS; UPF0126    |
| 208. | 3782926-3783969 | ATH69836.1 | ShiA-like protein; tetratricopeptide repeat protein                                   | TPR_11; ANAPC3   |
| 209. | 3825886-        | ATH69872.1 | DUF202 domain-containing                                                              | DUF202; YidH     |

Supplementary Table 1- Functional domain analysis of 247 HP's present *S. flexneri* 1c Y394, using four bioinformatics tools namely CDD-BLAST, Pfam, InterProScan, and SCANPROSITE.

|      |                 |            |                                                                                                                                 |                                                                |
|------|-----------------|------------|---------------------------------------------------------------------------------------------------------------------------------|----------------------------------------------------------------|
|      | 3825539         |            | protein; Inner membrane protein YidH                                                                                            |                                                                |
| 210. | 3838868-3837591 | ATH70659.1 | DUF3748 domain-containing protein; putative Dipeptidyl aminopeptidases/acylaminoacyl-peptidase( <i>Shigella</i> ); yidR protein | DUF3748; DPPIV_N                                               |
| 211. | 3844997-3845653 | ATH70660.1 | Putative replicase; putative protein YidX; lipoprotein                                                                          | PRK10215                                                       |
| 212. | 3865481-3866230 | ATH69906.1 | 4'-phosphopantetheinyl transferase                                                                                              | Sfp                                                            |
| 213. | 3872412-3872948 | ATH69913.1 | Colicin E2 tolerance protein; CbrC family protein                                                                               | CbrC; UPF0167                                                  |
| 214. | 3933224-3933562 | ATH69954.1 | macrodomain Ori organization protein MaoP; protein YifE                                                                         | YifE; DUF413                                                   |
| 215. | 3981918-3982121 | ATH69997.1 | Putative lipoprotein                                                                                                            | LPAM_2; Prokaryotic lipoprotein-attachment site                |
| 216. | 3992061-3991645 | ATH70006.1 | Inner membrane protein YigG                                                                                                     | PRK11371                                                       |
| 217. | 3993529-3993062 | ATH70008.1 | Thioesterase family protein                                                                                                     | Hot_Dog; unchar_dom_1; 4HBT; Paal_thioesterase; Paal; PRK11688 |
| 218. | 4032669-4034099 | ATH70042.1 | DUF945 family protein; putative GTP-binding protein                                                                             | DUF945                                                         |
| 219. | 4049523-4050503 | ATH70056.1 | Xylose isomerase-like TIM barrel family protein                                                                                 | AP2Ec; AP_endonucl_2_N                                         |
| 220. | 4064498-4065370 | ATH70067.1 | Virulence factor BrkB family protein                                                                                            | Virul_fac_BrkB                                                 |

Supplementary Table 1- Functional domain analysis of 247 HP's present *S. flexneri* 1c Y394, using four bioinformatics tools namely CDD-BLAST, Pfam, InterProScan, and SCANPROSITE.

|      |                 |            |                                                                                                     |                               |
|------|-----------------|------------|-----------------------------------------------------------------------------------------------------|-------------------------------|
| 221. | 4103725-4104024 | ATH70101.1 | DUF406 domain-containing protein; putative C-4 dicarboxylate transport protein                      | DUF406                        |
| 222. | 4118747-4118139 | ATH70117.1 | YiiX family permuted papain-like enzyme                                                             | NLPC_P60; Peptidase_C92; YycO |
| 223. | 4195331-4196026 | ATH70671.1 | DUF1481 domain-containing membrane protein                                                          | DUF1481                       |
| 224. | 4233545-4233387 | ATH70198.1 | 4Fe-4S mono-cluster protein Yjdl                                                                    | Fer4_19; Yjdl; Fer4_19        |
| 225. | 4239831-4240460 | ATH70203.1 | DUF2238 domain-containing protein; Inner membrane protein yjdF                                      | DUF2238                       |
| 226. | 4256029-4255151 | ATH70213.1 | Yjcz family like protein; Mutational suppressor of yhjH motility mutation,                          | YjcZ                          |
| 227. | 4262875-4262594 | ATH70218.1 | Yjcb family membrane protein                                                                        | YjcB                          |
| 228. | 4263304-4263621 | ATH70219.1 | signal transduction protein; putative EAL domain protein regulator; c-di-GMP phosphodiesterase PdeC | EAL; YjcC; CSS-motif          |
| 229. | 4284544-4283855 | ATH70237.1 | Sel1 repeat protein; involved in signal transduction.                                               | Sel1                          |
| 230. | 4296494-4296138 | ATH70244.1 | MmcQ/YjbR family DNA-binding protein                                                                | MmcQ/YjbR                     |
| 231. | 4330712-4330206 | ATH70274.1 | group 4 capsule (G4C) polysaccharide, YmcB                                                          | Caps_synth_GfcC               |

Supplementary Table 1- Functional domain analysis of 247 HP's present *S. flexneri* 1c Y394, using four bioinformatics tools namely CDD-BLAST, Pfam, InterProScan, and SCANPROSITE.

|      |                 |            |                                                                                             |                        |
|------|-----------------|------------|---------------------------------------------------------------------------------------------|------------------------|
| 232. | 4330932-4330651 | ATH70275.1 | group 4 capsule (G4C) polysaccharide, YmcB                                                  | Caps_synth_GfcC        |
| 233. | 4331923-4331681 | ATH70277.1 | exopolysaccharide production YjbE family protein                                            | YjbE                   |
| 234. | 4341114-4341797 | ATH70286.1 | YjiH family protein; nucleoside recognition family protein                                  | YjiH; Gate superfamily |
| 235. | 4341794-4342255 | ATH70287.1 | Putative membrane protein; putative transporter; nucleoside recognition family protein-     | SpmB; Gate superfamily |
| 236. | 4386466-4385270 | ATH70326.1 | DUF898 domain-containing protein; Inner membrane protein yjgN                               | YjgN; DUF898           |
| 237. | 4407905-4408456 | ATH70347.1 | ribosome-associated protein                                                                 | YjgA; DUF615           |
| 238. | 4437881-4438426 | ATH70373.1 | cell division protein YtfB                                                                  | OapA                   |
| 239. | 4460738-4460205 | ATH70395.1 | outer membrane lipoprotein Blc                                                              | Lipocalins             |
| 240. | 4495036-4496199 | ATH70424.1 | Glutathionylspermidine synthase pre ATP-grasp family protein                                | GSP_Synth; PHA02117    |
| 241. | 4498300-4498025 | ATH70426.1 | protease activator YjfN; putative inner membrane protein; DUF1471 domain-containing protein | DUF 1471; PRK14864     |
| 242. | 4506798-4506523 | ATH70436.1 | DUF1471 domain-containing protein; Stress resistance                                        | DUF1471                |

Supplementary Table 1- Functional domain analysis of 247 HP's present *S. flexneri* 1c Y394, using four bioinformatics tools namely CDD-BLAST, Pfam, InterProScan, and SCANPROSITE.

|      |                 |            | protein                                                                                               |             |
|------|-----------------|------------|-------------------------------------------------------------------------------------------------------|-------------|
| 243. | 4512148-4511807 | ATH70444.1 | Endoribonuclease SymE                                                                                 | Sym_E toxin |
| 244. | 4521008-4520805 | ATH70449.1 | YbdD/YjiX family protein;<br>Selenoprotein                                                            | Sel_put     |
| 245. | 4545828-4545355 | ATH70469.1 | threonine/serine exporter                                                                             | ThrE        |
| 246. | 4546589-4545819 | ATH70687.1 | Inner membrane protein yjjP;<br>threonine/serine exporter ThrE<br>family protein; DUF 1212<br>protein | YjjP; ThrE  |
