# Supplementary material for: Functional Annotation and Curation of Hypothetical Proteins Present in A Newly Emerged Serotype 1c of Shigella flexneri: Emphasis on Selecting Targets for Virulence and Vaccine Design Studies
Source: MDPI journal article supplement (doi:10.3390/genes11030340), 2020-03-23
Supplement: s1 [file s1]

Supplementary Table 2- Analysis of physiochemical characteristics for the 246 HP's present in *S.flexneri* 1c Y394. ExPASy's ProtParam tool was used to study physiochemical properties of the HP's which included number of amino acids, molecular weight, theoretical pI, extinction coefficient, and grand average of hydropathicity (GRAVY).

| S.No | Protein ID | No of amino acids | MW       | PI   | Extinction Coefficient | Grand Average of Hydrophobicity (GRAVY) |
|------|------------|-------------------|----------|------|------------------------|-----------------------------------------|
| 1.   | ATH66527.1 | 237               | 26708.94 | 9.37 | 15595                  | -0.284                                  |
| 2.   | ATH66629.1 | 302               | 34186.18 | 9.11 | 22960                  | -0.299                                  |
| 3.   | ATH66635.1 | 115               | 12509.10 | 6.75 | 7115                   | -0.357                                  |
| 4.   | ATH66643.1 | 409               | 46351.22 | 9.84 | 59820                  | -0.284                                  |
| 5.   | ATH66665.1 | 207               | 22289.85 | 7.80 | 29575                  | 0.904                                   |
| 6.   | ATH66697.1 | 181               | 20876.67 | 4.94 | 50085                  | -0.357                                  |
| 7.   | ATH66700.1 | 274               | 29970.40 | 7.62 | 24325                  | -0.016                                  |
| 8.   | ATH66742.1 | 102               | 11396.45 | 9.89 | 21095                  | 0.501                                   |
| 9.   | ATH66743.1 | 364               | 40443.32 | 9.61 | 51005                  | -0.384                                  |
| 10.  | ATH66760.1 | 239               | 26104.41 | 6.82 | 14940                  | 0.026                                   |
| 11.  | ATH66809.1 | 62                | 7152.09  | 6.72 | 11460                  | -1.239                                  |
| 12.  | ATH66812.1 | 94                | 10234.40 | 4.47 | 12950                  | -0.039                                  |
| 13.  | ATH66845.1 | 717               | 81623.66 | 6.06 | 139845                 | -0.823                                  |
| 14.  | ATH66856.1 | 192               | 20906.02 | 9.04 | 7450                   | -0.062                                  |

Supplementary Table 2- Analysis of physiochemical characteristics for the 246 HP's present in *S.flexneri* 1c Y394. ExPASy's ProtParam tool was used to study physiochemical properties of the HP's which included number of amino acids, molecular weight, theoretical pI, extinction coefficient, and grand average of hydropathicity (GRAVY).

|            |            |     |          |      |        |        |
|------------|------------|-----|----------|------|--------|--------|
| <b>15.</b> | ATH66865.1 | 123 | 12703.65 | 8.76 | 2980   | 0.019  |
| <b>16.</b> | ATH66868.1 | 524 | 60063.95 | 6.51 | 109235 | -0.256 |
| <b>17.</b> | ATH66876.1 | 190 | 19441.24 | 7.87 | 6990   | 0.172  |
| <b>18.</b> | ATH66880.1 | 156 | 18267.19 | 6.74 | 21430  | 0.103  |
| <b>19.</b> | ATH66907.1 | 264 | 29902.48 | 6.24 | 48930  | -0.228 |
| <b>20.</b> | ATH66913.1 | 152 | 16938.82 | 7.07 | 56490  | 0.376  |
| <b>21.</b> | ATH66937.1 | 172 | 19064.66 | 4.89 | 20190  | -0.035 |
| <b>22.</b> | ATH66941.1 | 296 | 33145.90 | 8.75 | 59025  | -0.158 |
| <b>23.</b> | ATH66955.1 | 122 | 14040.28 | 8.71 | 20970  | -0.358 |
| <b>24.</b> | ATH66978.1 | 65  | 7467.46  | 6.70 | 7575   | -0.797 |
| <b>25.</b> | ATH67045.1 | 701 | 77354.73 | 4.87 | 146345 | -0.496 |
| <b>26.</b> | ATH67048.1 | 216 | 24527.70 | 5.12 | 22015  | -0.348 |
| <b>27.</b> | ATH67052.1 | 218 | 23986.66 | 5.06 | 36565  | 0.028  |
| <b>28.</b> | ATH67074.1 | 108 | 12016.68 | 7.59 | 8730   | -0.547 |
| <b>29.</b> | ATH67096.1 | 235 | 26939.26 | 5.03 | 72100  | -0.407 |

Supplementary Table 2- Analysis of physiochemical characteristics for the 246 HP's present in *S.flexneri* 1c Y394. ExPASy's ProtParam tool was used to study physiochemical properties of the HP's which included number of amino acids, molecular weight, theoretical pI, extinction coefficient, and grand average of hydropathicity (GRAVY).

|            |            |     |          |       |        |        |
|------------|------------|-----|----------|-------|--------|--------|
| <b>30.</b> | ATH67099.1 | 235 | 27696.14 | 4.97  | 73715  | -0.496 |
| <b>31.</b> | ATH67100.1 | 325 | 37196.09 | 4.91  | 100980 | -0.633 |
| <b>32.</b> | ATH67113.1 | 87  | 9827.35  | 5.50  | 5960   | -0.166 |
| <b>33.</b> | ATH67162.1 | 140 | 15620.86 | 7.95  | 20970  | -0.309 |
| <b>34.</b> | ATH67165.1 | 221 | 25837.34 | 8.07  | 45880  | -0.691 |
| <b>35.</b> | ATH67175.1 | 123 | 14054.13 | 9.00  | 17085  | -0.238 |
| <b>36.</b> | ATH70531.1 | 613 | 68940.90 | 5.49  | 101925 | -0.450 |
| <b>37.</b> | ATH67180.1 | 274 | 31148.59 | 6.67  | 37150  | -0.455 |
| <b>38.</b> | ATH67230.1 | 87  | 10105.81 | 10.07 | 9970   | -0.663 |
| <b>39.</b> | ATH67236.1 | 302 | 32814.94 | 6.00  | 14440  | 0.030  |
| <b>40.</b> | ATH67241.1 | 234 | 25901.87 | 9.62  | 38390  | 0.815  |
| <b>41.</b> | ATH67298.1 | 136 | 15464.69 | 10.03 | 36105  | 0.654  |
| <b>42.</b> | ATH67300.1 | 125 | 14203.22 | 10.10 | 22375  | 0.751  |
| <b>43.</b> | ATH67303.1 | 95  | 10520.70 | 9.39  | 1490   | 0.463  |
| <b>44.</b> | ATH67308.1 | 158 | 17666.10 | 4.12  | 14105  | 0.126  |
| <b>45.</b> | ATH67318.1 | 162 | 18518.04 | 9.72  | 33460  | 0.581  |
| <b>46.</b> | ATH70538.1 | 107 | 11421.98 | 4.90  | 4470   | 0.102  |
| <b>47.</b> | ATH67325.1 | 337 | 38100.69 | 8.97  | 46660  | -0.297 |

Supplementary Table 2- Analysis of physiochemical characteristics for the 246 HP's present in *S.flexneri* 1c Y394. ExPASy's ProtParam tool was used to study physiochemical properties of the HP's which included number of amino acids, molecular weight, theoretical pI, extinction coefficient, and grand average of hydropathicity (GRAVY).

|            |            |     |          |       |                                                                                            |        |
|------------|------------|-----|----------|-------|--------------------------------------------------------------------------------------------|--------|
| <b>48.</b> | ATH67371.1 | 299 | 32312.01 | 9.18  | 29575                                                                                      | 1.077  |
| <b>49.</b> | ATH67373.1 | 60  | 6854.98  | 4.91  | 7115                                                                                       | -0.127 |
| <b>50.</b> | ATH70540.1 | 297 | 34487.65 | 6.61  | 80690                                                                                      | -0.303 |
| <b>51.</b> | ATH67401.1 | 182 | 20354.38 | 10.27 | 15930                                                                                      | -0.383 |
| <b>52.</b> | ATH67406.1 | 369 | 40597.26 | 7.03  | 40950                                                                                      | -0.189 |
| <b>53.</b> | ATH67413.1 | 187 | 20634.41 | 5.81  | 48930                                                                                      | -0.158 |
| <b>54.</b> | ATH67436.1 | 148 | 16275.36 | 9.41  | 34615                                                                                      | 0.777  |
| <b>55.</b> | ATH67468.1 | 214 | 24155.58 | 6.91  | 37595                                                                                      | -0.154 |
| <b>56.</b> | ATH67536.1 | 163 | 17060.40 | 9.21  | 39210                                                                                      | 0.948  |
| <b>57.</b> | ATH67540.1 | 191 | 20942.50 | 5.57  | 16960                                                                                      | -0.436 |
| <b>58.</b> | ATH67546.1 | 125 | 13933.06 | 6.96  | 16055                                                                                      | 0.035  |
| <b>59.</b> | ATH67604.1 | 180 | 21226.18 | 6.13  | 21680                                                                                      | -0.591 |
| <b>60.</b> | ATH67634.1 | 93  | 10251.77 | 5.08  | 18575                                                                                      | -0.032 |
| <b>61.</b> | ATH67647.1 | 117 | 12692.75 | 5.02  | 8605                                                                                       | 0.190  |
| <b>62.</b> | ATH67677.1 | 98  | 10602.04 | 5.19  | 11460                                                                                      | -0.031 |
| <b>63.</b> | ATH67684.1 | 59  | 6032.37  | 9.87  | As there are no Trp, Tyr or Cys in the region considered, protein should not be visible by | -1.680 |

Supplementary Table 2- Analysis of physiochemical characteristics for the 246 HP's present in *S.flexneri* 1c Y394. ExPASy's ProtParam tool was used to study physiochemical properties of the HP's which included number of amino acids, molecular weight, theoretical pI, extinction coefficient, and grand average of hydropathicity (GRAVY).

|            |            |     |          |      | UV spectrophotometry. |        |
|------------|------------|-----|----------|------|-----------------------|--------|
| <b>64.</b> | ATH67716.1 | 117 | 13959.89 | 9.25 | 26595                 | -0.638 |
| <b>65.</b> | ATH67743.1 | 226 | 25958.54 | 4.56 | 52955                 | -0.672 |
| <b>66.</b> | ATH67744.1 | 55  | 6428.82  | 4.33 | 12950                 | -0.705 |
| <b>67.</b> | ATH67746.1 | 465 | 52795.82 | 8.49 | 71640                 | -0.235 |
| <b>68.</b> | ATH67804.1 | 79  | 8586.18  | 9.18 | 10095                 | 0.562  |
| <b>69.</b> | ATH67810.1 | 206 | 22032.08 | 5.91 | 30480                 | 0.743  |
| <b>70.</b> | ATH70565.1 | 114 | 12493.23 | 4.96 | 20970                 | 0.024  |
| <b>71.</b> | ATH67825.1 | 193 | 20921.12 | 9.55 | 39420                 | -0.120 |
| <b>72.</b> | ATH67828.1 | 33  | 3871.38  | 4.32 | 16960                 | -0.191 |
| <b>73.</b> | ATH67852.1 | 346 | 40272.23 | 7.57 | 93320                 | -0.296 |
| <b>74.</b> | ATH67855.1 | 206 | 22709.81 | 8.49 | 47565                 | 0.686  |
| <b>75.</b> | ATH67883.1 | 178 | 20337.04 | 6.83 | 22460                 | 0.521  |
| <b>76.</b> | ATH67885.1 | 96  | 10864.99 | 4.23 | 13980                 | -0.470 |

Supplementary Table 2- Analysis of physiochemical characteristics for the 246 HP's present in *S.flexneri* 1c Y394. ExPASy's ProtParam tool was used to study physiochemical properties of the HP's which included number of amino acids, molecular weight, theoretical pI, extinction coefficient, and grand average of hydropathicity (GRAVY).

|            |            |      |           |       |        |        |
|------------|------------|------|-----------|-------|--------|--------|
| <b>77.</b> | ATH67887.1 | 252  | 27598.27  | 4.99  | 53860  | -0.502 |
| <b>78.</b> | ATH67921.1 | 118  | 13537.84  | 10.05 | 12950  | -0.281 |
| <b>79.</b> | ATH67934.1 | 172  | 18264.75  | 4.74  | 17085  | 0.105  |
| <b>80.</b> | ATH67952.1 | 304  | 34736.88  | 8.27  | 42650  | 0.359  |
| <b>81.</b> | ATH67957.1 | 95   | 10047.59  | 8.98  | 2980   | 0.323  |
| <b>82.</b> | ATH67966.1 | 108  | 11905.49  | 9.10  | 44710  | 1.152  |
| <b>83.</b> | ATH67967.1 | 113  | 12942.69  | 9.15  | 18115  | -0.761 |
| <b>84.</b> | ATH67969.1 | 101  | 10503.72  | 4.74  | 1740   | -0.149 |
| <b>85.</b> | ATH67997.1 | 111  | 12323.10  | 9.51  | 36565  | 1.312  |
| <b>86.</b> | ATH68032.1 | 155  | 15601.67  | 9.36  | 2980   | 0.114  |
| <b>87.</b> | ATH68055.1 | 418  | 42880.00  | 4.41  | 20190  | 0.021  |
| <b>88.</b> | ATH68061.1 | 215  | 24442.58  | 4.50  | 32110  | -0.268 |
| <b>89.</b> | ATH68062.1 | 208  | 22366.92  | 8.26  | 22095  | -0.005 |
| <b>90.</b> | ATH68063.1 | 69   | 7907.33   | 9.36  | 1490   | -0.351 |
| <b>91.</b> | ATH68075.1 | 1018 | 113233.17 | 6.93  | 101855 | -0.139 |
| <b>92.</b> | ATH68076.1 | 370  | 39841.18  | 8.49  | 78950  | 1.029  |
| <b>93.</b> | ATH68077.1 | 118  | 13847.80  | 5.75  | 28210  | -0.375 |

Supplementary Table 2- Analysis of physiochemical characteristics for the 246 HP's present in *S.flexneri* 1c Y394. ExPASy's ProtParam tool was used to study physiochemical properties of the HP's which included number of amino acids, molecular weight, theoretical pI, extinction coefficient, and grand average of hydropathicity (GRAVY).

|             |            |     |          |       |        |        |
|-------------|------------|-----|----------|-------|--------|--------|
| <b>94.</b>  | ATH68089.1 | 439 | 49574.34 | 9.25  | 107955 | -0.464 |
| <b>95.</b>  | ATH68112.1 | 149 | 15794.96 | 11.35 | 23490  | 1.197  |
| <b>96.</b>  | ATH68113.1 | 77  | 8799.88  | 5.59  | 1490   | -0.636 |
| <b>97.</b>  | ATH70578.1 | 73  | 8502.34  | 10.18 | 15470  | 0.936  |
| <b>98.</b>  | ATH68125.1 | 280 | 30680.47 | 4.92  | 37150  | 0.048  |
| <b>99.</b>  | ATH68140.1 | 166 | 19111.68 | 5.69  | 31970  | -0.324 |
| <b>100.</b> | ATH68145.1 | 585 | 65584.90 | 9.09  | 83895  | -0.217 |
| <b>101.</b> | ATH68146.1 | 201 | 22544.08 | 8.69  | 35200  | 0.821  |
| <b>102.</b> | ATH68152.1 | 108 | 11964.87 | 9.59  | 11460  | -0.225 |
| <b>103.</b> | ATH68154.1 | 88  | 8725.99  | 7.58  | 7365   | 0.335  |
| <b>104.</b> | ATH68182.1 | 124 | 13410.22 | 9.48  | 16960  | -0.262 |
| <b>105.</b> | ATH68188.1 | 118 | 12946.72 | 9.27  | 21095  | -0.393 |
| <b>106.</b> | ATH68190.1 | 40  | 4571.21  | 4.46  | 2980   | -0.432 |

Supplementary Table 2- Analysis of physiochemical characteristics for the 246 HP's present in *S.flexneri* 1c Y394. ExPASy's ProtParam tool was used to study physiochemical properties of the HP's which included number of amino acids, molecular weight, theoretical pI, extinction coefficient, and grand average of hydropathicity (GRAVY).

|             |            |     |          |      |        |        |
|-------------|------------|-----|----------|------|--------|--------|
| <b>107.</b> | ATH68203.1 | 200 | 22674.98 | 7.71 | 36690  | -0.131 |
| <b>108.</b> | ATH68230.1 | 119 | 13650.86 | 9.83 | 11460  | -0.386 |
| <b>109.</b> | ATH68234.1 | 189 | 21371.79 | 9.23 | 7700   | -0.256 |
| <b>110.</b> | ATH68239.1 | 116 | 13261.31 | 8.20 | 17990  | -0.290 |
| <b>111.</b> | ATH68240.1 | 131 | 15226.27 | 9.39 | 38055  | 0.654  |
| <b>112.</b> | ATH68248.1 | 162 | 18875.16 | 4.69 | 28670  | -0.619 |
| <b>113.</b> | ATH68250.1 | 152 | 17467.15 | 9.99 | 17990  | -0.320 |
| <b>114.</b> | ATH68272.1 | 107 | 11755.46 | 6.56 | 6210   | 0.277  |
| <b>115.</b> | ATH68293.1 | 137 | 14959.21 | 4.87 | 22585  | -0.242 |
| <b>116.</b> | ATH68294.1 | 401 | 44486.93 | 9.98 | 112660 | 0.573  |
| <b>117.</b> | ATH68297.1 | 183 | 19420.85 | 7.77 | 36565  | -0.192 |



Supplementary Table 2- Analysis of physiochemical characteristics for the 246 HP's present in *S.flexneri* 1c Y394. ExPASy's ProtParam tool was used to study physiochemical properties of the HP's which included number of amino acids, molecular weight, theoretical pI, extinction coefficient, and grand average of hydropathicity (GRAVY).

|             |            |     |          |       |       |        |
|-------------|------------|-----|----------|-------|-------|--------|
| <b>118.</b> | ATH68320.1 | 133 | 15126.99 | 5.46  | 30480 | -0.483 |
| <b>119.</b> | ATH68327.1 | 65  | 7206.48  | 10.01 | 20970 | 0.272  |
| <b>120.</b> | ATH68340.1 | 121 | 13841.10 | 9.83  | 11460 | -0.322 |
| <b>121.</b> | ATH68357.1 | 121 | 13841.10 | 9.83  | 11460 | -0.322 |
| <b>122.</b> | ATH68374.1 | 75  | 8092.21  | 4.16  | 12615 | 0.151  |
| <b>123.</b> | ATH70596.1 | 163 | 18646.13 | 9.59  | 19035 | 0.340  |
| <b>124.</b> | ATH68421.1 | 149 | 16252.48 | 9.86  | 30480 | 0.817  |
| <b>125.</b> | ATH68460.1 | 174 | 18301.71 | 4.80  | 7575  | 0.032  |
| <b>126.</b> | ATH68471.1 | 378 | 42308.42 | 6.09  | 47690 | -0.147 |
| <b>127.</b> | ATH68472.1 | 667 | 73639.99 | 5.90  | 94390 | -0.114 |
| <b>128.</b> | ATH68473.1 | 153 | 16591.09 | 7.72  | 7450  | -0.174 |

Supplementary Table 2- Analysis of physiochemical characteristics for the 246 HP's present in *S.flexneri* 1c Y394. ExPASy's ProtParam tool was used to study physiochemical properties of the HP's which included number of amino acids, molecular weight, theoretical pI, extinction coefficient, and grand average of hydropathicity (GRAVY).

|             |            |     |          |      |       |        |
|-------------|------------|-----|----------|------|-------|--------|
| <b>129.</b> | ATH68497.1 | 132 | 14607.71 | 9.15 | 25565 | 1.072  |
| <b>130.</b> | ATH68515.1 | 349 | 36940.16 | 9.24 | 49055 | 0.987  |
| <b>131.</b> | ATH68531.1 | 237 | 26761.12 | 9.88 | 42970 | 0.651  |
| <b>132.</b> | ATH68551.1 | 69  | 7308.51  | 8.74 | 8605  | 0.043  |
| <b>133.</b> | ATH68606.1 | 88  | 9960.62  | 9.61 | 17210 | 0.059  |
| <b>134.</b> | ATH68609.1 | 216 | 25324.18 | 9.31 | 51005 | -0.482 |
| <b>135.</b> | ATH68611.1 | 68  | 7571.05  | 6.54 | 1615  | 0.287  |
| <b>136.</b> | ATH68620.1 | 180 | 18611.71 | 4.73 | 28880 | -0.080 |
| <b>137.</b> | ATH68658.1 | 164 | 19562.24 | 5.96 | 31525 | -0.567 |
| <b>138.</b> | ATH68659.1 | 151 | 17198.23 | 9.94 | 33460 | 0.012  |
| <b>139.</b> | ATH68662.1 | 506 | 54795.66 | 7.03 | 67045 | 0.746  |

Supplementary Table 2- Analysis of physiochemical characteristics for the 246 HP's present in *S.flexneri* 1c Y394. ExPASy's ProtParam tool was used to study physiochemical properties of the HP's which included number of amino acids, molecular weight, theoretical pI, extinction coefficient, and grand average of hydropathicity (GRAVY).

|             |            |     |          |       |       |        |
|-------------|------------|-----|----------|-------|-------|--------|
| <b>140.</b> | ATH68680.1 | 219 | 24540.33 | 8.63  | 25900 | 0.821  |
| <b>141.</b> | ATH68691.1 | 269 | 28673.44 | 9.59  | 21680 | 0.843  |
| <b>142.</b> | ATH68709.1 | 310 | 34454.08 | 5.25  | 48470 | 0.147  |
| <b>143.</b> | ATH68713.1 | 76  | 8251.81  | 4.32  | 17085 | 1.164  |
| <b>144.</b> | ATH68737.1 | 108 | 13262.69 | 10.11 | 54430 | -1.443 |
| <b>145.</b> | ATH68741.1 | 114 | 12719.61 | 9.45  | 13980 | -0.532 |
| <b>146.</b> | ATH68742.1 | 130 | 14898.09 | 7.77  | 14105 | -0.538 |
| <b>147.</b> | ATH68747.1 | 72  | 8415.05  | 8.01  | 8480  | -0.194 |
| <b>148.</b> | ATH68756.1 | 124 | 13655.81 | 7.80  | 3105  | -0.187 |
| <b>149.</b> | ATH68766.1 | 149 | 17116.28 | 8.77  | 48595 | 0.570  |
| <b>150.</b> | ATH70611.1 | 206 | 24037.30 | 8.77  | 30035 | -0.591 |

Supplementary Table 2- Analysis of physiochemical characteristics for the 246 HP's present in *S.flexneri* 1c Y394. ExPASy's ProtParam tool was used to study physiochemical properties of the HP's which included number of amino acids, molecular weight, theoretical pI, extinction coefficient, and grand average of hydropathicity (GRAVY).

|             |            |     |          |       |        |        |
|-------------|------------|-----|----------|-------|--------|--------|
| <b>151.</b> | ATH68777.1 | 337 | 38100.69 | 8.97  | 46660  | -0.297 |
| <b>152.</b> | ATH68793.1 | 299 | 32312.01 | 9.18  | 29575  | 1.077  |
| <b>153.</b> | ATH68830.1 | 60  | 6854.98  | 4.91  | 7115   | -0.127 |
| <b>154.</b> | ATH68837.1 | 297 | 34487.65 | 6.61  | 80690  | -0.303 |
| <b>155.</b> | ATH68856.1 | 182 | 20354.38 | 10.27 | 15930  | -0.383 |
| <b>156.</b> | ATH68864.1 | 274 | 29970.40 | 7.62  | 24325  | -0.016 |
| <b>157.</b> | ATH68917.1 | 701 | 77354.73 | 4.87  | 146345 | -0.496 |
| <b>158.</b> | ATH68929.1 | 216 | 24527.70 | 5.12  | 22015  | -0.348 |
| <b>159.</b> | ATH68931.1 | 218 | 23986.66 | 5.06  | 36565  | 0.028  |
| <b>160.</b> | ATH68947.1 | 108 | 12016.68 | 7.59  | 8730   | -0.547 |
| <b>161.</b> | ATH68957.1 | 235 | 26939.26 | 5.03  | 72100  | -0.407 |

Supplementary Table 2- Analysis of physiochemical characteristics for the 246 HP's present in *S.flexneri* 1c Y394. ExPASy's ProtParam tool was used to study physiochemical properties of the HP's which included number of amino acids, molecular weight, theoretical pI, extinction coefficient, and grand average of hydropathicity (GRAVY).

|             |            |     |          |      |        |        |
|-------------|------------|-----|----------|------|--------|--------|
| <b>162.</b> | ATH68961.1 | 235 | 27696.14 | 4.97 | 73715  | -0.496 |
| <b>163.</b> | ATH68975.1 | 325 | 37196.09 | 4.91 | 100980 | -0.633 |
| <b>164.</b> | ATH69025.1 | 87  | 9827.35  | 5.50 | 5960   | -0.166 |
| <b>165.</b> | ATH69052.1 | 152 | 16938.82 | 7.07 | 56490  | 0.376  |
| <b>166.</b> | ATH69068.1 | 172 | 19064.66 | 4.89 | 20190  | -0.035 |
| <b>167.</b> | ATH69109.1 | 296 | 33145.90 | 8.75 | 59025  | -0.158 |
| <b>168.</b> | ATH69124.1 | 122 | 14040.28 | 8.71 | 20970  | -0.358 |
| <b>169.</b> | ATH69181.1 | 65  | 7467.46  | 6.70 | 7575   | -0.797 |
| <b>170.</b> | ATH69187.1 | 701 | 77354.73 | 4.87 | 146345 | -0.496 |
| <b>171.</b> | ATH69209.1 | 216 | 24527.70 | 5.12 | 22015  | -0.348 |

Supplementary Table 2- Analysis of physiochemical characteristics for the 246 HP's present in *S.flexneri* 1c Y394. ExPASy's ProtParam tool was used to study physiochemical properties of the HP's which included number of amino acids, molecular weight, theoretical pI, extinction coefficient, and grand average of hydropathicity (GRAVY).

|             |            |     |          |      |        |        |
|-------------|------------|-----|----------|------|--------|--------|
| <b>172.</b> | ATH69239.1 | 218 | 23986.66 | 5.06 | 36565  | 0.028  |
| <b>173.</b> | ATH69259.1 | 108 | 12016.68 | 7.59 | 8730   | -0.547 |
| <b>174.</b> | ATH69265.1 | 235 | 26939.26 | 5.03 | 72100  | -0.407 |
| <b>175.</b> | ATH69300.1 | 235 | 27696.14 | 4.97 | 73715  | -0.496 |
| <b>176.</b> | ATH69301.1 | 148 | 16275.36 | 9.41 | 34615  | 0.777  |
| <b>177.</b> | ATH69313.1 | 214 | 24155.58 | 6.91 | 37595  | -0.154 |
| <b>178.</b> | ATH69314.1 | 163 | 17060.40 | 9.21 | 39210  | 0.948  |
| <b>179.</b> | ATH69322.1 | 701 | 77354.73 | 4.87 | 146345 | -0.496 |
| <b>180.</b> | ATH69323.1 | 216 | 24527.70 | 5.12 | 22015  | -0.348 |
| <b>181.</b> | ATH69359.1 | 218 | 23986.66 | 5.06 | 36565  | 0.028  |

Supplementary Table 2- Analysis of physiochemical characteristics for the 246 HP's present in *S.flexneri* 1c Y394. ExPASy's ProtParam tool was used to study physiochemical properties of the HP's which included number of amino acids, molecular weight, theoretical pI, extinction coefficient, and grand average of hydropathicity (GRAVY).

|             |            |     |          |       |       |        |
|-------------|------------|-----|----------|-------|-------|--------|
| <b>182.</b> | ATH69360.1 | 108 | 12016.68 | 7.59  | 8730  | -0.547 |
| <b>183.</b> | ATH69408.1 | 235 | 26939.26 | 5.03  | 72100 | -0.407 |
| <b>184.</b> | ATH69432.1 | 235 | 27696.14 | 4.97  | 73715 | -0.496 |
| <b>185.</b> | ATH69450.1 | 65  | 7206.48  | 10.01 | 20970 | 0.272  |
| <b>186.</b> | ATH69450.1 | 121 | 13841.10 | 9.83  | 11460 | -0.322 |
| <b>187.</b> | ATH69519.1 | 121 | 13841.10 | 9.83  | 11460 | -0.322 |
| <b>188.</b> | ATH69527.1 | 114 | 12493.23 | 4.96  | 20970 | 0.024  |
| <b>189.</b> | ATH69530.1 | 193 | 20921.12 | 9.55  | 39420 | -0.120 |
| <b>190.</b> | ATH69548.1 | 33  | 3871.38  | 4.32  | 16960 | -0.191 |
| <b>191.</b> | ATH69552.1 | 346 | 40272.23 | 7.57  | 93320 | -0.296 |

Supplementary Table 2- Analysis of physiochemical characteristics for the 246 HP's present in *S.flexneri* 1c Y394. ExPASy's ProtParam tool was used to study physiochemical properties of the HP's which included number of amino acids, molecular weight, theoretical pI, extinction coefficient, and grand average of hydropathicity (GRAVY).

|             |            |     |          |       |        |        |
|-------------|------------|-----|----------|-------|--------|--------|
| <b>192.</b> | ATH69554.1 | 136 | 15464.69 | 10.03 | 36105  | 0.654  |
| <b>193.</b> | ATH69573.1 | 369 | 40597.26 | 7.03  | 40950  | -0.189 |
| <b>194.</b> | ATH69585.1 | 187 | 20634.41 | 5.81  | 48930  | -0.158 |
| <b>195.</b> | ATH69653.1 | 148 | 16275.36 | 9.41  | 34615  | 0.777  |
| <b>196.</b> | ATH69662.1 | 214 | 24155.58 | 6.91  | 37595  | -0.154 |
| <b>197.</b> | ATH69677.1 | 163 | 17060.40 | 9.21  | 39210  | 0.948  |
| <b>198.</b> | ATH69683.1 | 191 | 20942.50 | 5.57  | 16960  | -0.436 |
| <b>199.</b> | ATH69717.1 | 125 | 13933.06 | 6.96  | 16055  | 0.035  |
| <b>200.</b> | ATH69741.1 | 180 | 21226.18 | 6.13  | 21680  | -0.591 |
| <b>201.</b> | ATH69743.1 | 93  | 10251.77 | 5.08  | 18575  | -0.032 |
| <b>202.</b> | ATH69744.1 | 717 | 81623.66 | 6.06  | 139845 | -0.823 |



Supplementary Table 2- Analysis of physiochemical characteristics for the 246 HP's present in *S.flexneri* 1c Y394. ExPASy's ProtParam tool was used to study physiochemical properties of the HP's which included number of amino acids, molecular weight, theoretical pI, extinction coefficient, and grand average of hydropathicity (GRAVY).

|             |            |     |          |       |       |        |
|-------------|------------|-----|----------|-------|-------|--------|
| <b>203.</b> | ATH69782.1 | 108 | 11905.49 | 9.10  | 44710 | 1.152  |
| <b>204.</b> | ATH70654.1 | 113 | 12942.69 | 9.15  | 18115 | -0.761 |
| <b>205.</b> | ATH69795.1 | 101 | 10503.72 | 4.74  | 1740  | -0.149 |
| <b>206.</b> | ATH69815.1 | 111 | 12323.10 | 9.51  | 36565 | 1.312  |
| <b>207.</b> | ATH69824.1 | 155 | 15601.67 | 9.36  | 2980  | 0.114  |
| <b>208.</b> | ATH69836.1 | 418 | 42880.00 | 4.41  | 20190 | 0.021  |
| <b>209.</b> | ATH69872.1 | 297 | 34487.65 | 6.61  | 80690 | -0.303 |
| <b>210.</b> | ATH70659.1 | 182 | 20354.38 | 10.27 | 15930 | -0.383 |
| <b>211.</b> | ATH70660.1 | 239 | 26104.41 | 6.82  | 14940 | 0.026  |
| <b>212.</b> | ATH69906.1 | 140 | 15620.86 | 7.95  | 20970 | -0.309 |
| <b>213.</b> | ATH69913.1 | 221 | 25837.34 | 8.07  | 45880 | -0.691 |

Supplementary Table 2- Analysis of physiochemical characteristics for the 246 HP's present in *S.flexneri* 1c Y394. ExPASy's ProtParam tool was used to study physiochemical properties of the HP's which included number of amino acids, molecular weight, theoretical pI, extinction coefficient, and grand average of hydropathicity (GRAVY).

|             |            |     |          |       |        |        |
|-------------|------------|-----|----------|-------|--------|--------|
| <b>214.</b> | ATH69954.1 | 123 | 14054.13 | 9.00  | 17085  | -0.238 |
| <b>215.</b> | ATH69997.1 | 613 | 68940.90 | 5.49  | 101925 | -0.450 |
| <b>216.</b> | ATH70006.1 | 274 | 31148.59 | 6.67  | 37150  | -0.455 |
| <b>217.</b> | ATH70008.1 | 87  | 10105.81 | 10.07 | 9970   | -0.663 |
| <b>218.</b> | ATH70042.1 | 302 | 32814.94 | 6.00  | 14440  | 0.030  |
| <b>219.</b> | ATH70056.1 | 234 | 25901.87 | 9.62  | 38390  | 0.815  |
| <b>220.</b> | ATH70067.1 | 193 | 20921.12 | 9.55  | 39420  | -0.120 |
| <b>221.</b> | ATH70101.1 | 33  | 3871.38  | 4.32  | 16960  | -0.191 |
| <b>222.</b> | ATH70117.1 | 346 | 40272.23 | 7.57  | 93320  | -0.296 |
| <b>223.</b> | ATH70671.1 | 206 | 22709.81 | 8.49  | 47565  | 0.686  |
| <b>224.</b> | ATH70198.1 | 178 | 20337.04 | 6.83  | 22460  | 0.521  |

Supplementary Table 2- Analysis of physiochemical characteristics for the 246 HP's present in *S.flexneri* 1c Y394. ExPASy's ProtParam tool was used to study physiochemical properties of the HP's which included number of amino acids, molecular weight, theoretical pI, extinction coefficient, and grand average of hydropathicity (GRAVY).

|             |            |     |          |       |       |        |
|-------------|------------|-----|----------|-------|-------|--------|
|             |            |     |          |       |       |        |
| <b>225.</b> | ATH70203.1 | 96  | 10864.99 | 4.23  | 13980 | -0.470 |
| <b>226.</b> | ATH70213.1 | 252 | 27598.27 | 4.99  | 53860 | -0.502 |
| <b>227.</b> | ATH70218.1 | 304 | 34736.88 | 8.27  | 42650 | 0.359  |
| <b>228.</b> | ATH70219.1 | 95  | 10047.59 | 8.98  | 2980  | 0.323  |
| <b>229.</b> | ATH70237.1 | 77  | 8799.88  | 5.59  | 1490  | -0.636 |
| <b>230.</b> | ATH70244.1 | 73  | 8502.34  | 10.18 | 15470 | 0.936  |
| <b>231.</b> | ATH70274.1 | 280 | 30680.47 | 4.92  | 37150 | 0.048  |
| <b>232.</b> | ATH70275.1 | 166 | 19111.68 | 5.69  | 31970 | -0.324 |
| <b>233.</b> | ATH70277.1 | 108 | 12016.68 | 7.59  | 8730  | -0.547 |
| <b>234.</b> | ATH70286.1 | 235 | 26939.26 | 5.03  | 72100 | -0.407 |

Supplementary Table 2- Analysis of physiochemical characteristics for the 246 HP's present in *S.flexneri* 1c Y394. ExPASy's ProtParam tool was used to study physiochemical properties of the HP's which included number of amino acids, molecular weight, theoretical pI, extinction coefficient, and grand average of hydropathicity (GRAVY).

|             |            |     |          |       |        |         |
|-------------|------------|-----|----------|-------|--------|---------|
| <b>235.</b> | ATH70287.1 | 235 | 27696.14 | 4.97  | 73715  | -0.496  |
| <b>236.</b> | ATH70326.1 | 325 | 37196.09 | 4.91  | 100980 | -0.633  |
| <b>237.</b> | ATH70347.1 | 87  | 9827.35  | 5.50  | 5960   | -0.166  |
| <b>238.</b> | ATH70373.1 | 181 | 20118.78 | 6.28  | 13980  | -0.499  |
| <b>239.</b> | ATH70395.1 | 177 | 19911.71 | 8.88  | 35535  | - 0.194 |
| <b>240.</b> | ATH70424.1 | 387 | 45048.67 | 4.61  | 96175  | -0.443  |
| <b>241.</b> | ATH70426.1 | 91  | 9949.13  | 4.18  | 16960  | -0.141  |
| <b>242.</b> | ATH70436.1 | 91  | 10149.35 | 5.09  | 11460  | -0.153  |
| <b>243.</b> | ATH70444.1 | 113 | 12294.12 | 8.64  | 10095  | -0.168  |
| <b>244.</b> | ATH70449.1 | 67  | 7728.79  | 8.60  | 9065   | -0.945  |
| <b>245.</b> | ATH70469.1 | 157 | 17062.55 | 10.12 | 33460  | 0.882   |

Supplementary Table 2- Analysis of physiochemical characteristics for the 246 HP's present in *S.flexneri* 1c Y394. ExPASy's ProtParam tool was used to study physiochemical properties of the HP's which included number of amino acids, molecular weight, theoretical pI, extinction coefficient, and grand average of hydropathicity (GRAVY).

|      |            |     |          |      |       |       |
|------|------------|-----|----------|------|-------|-------|
| 246. | ATH70687.1 | 256 | 28000.88 | 8.87 | 32470 | 0.434 |
|------|------------|-----|----------|------|-------|-------|
